# Supplementary material for: A new approach to mapping landslide hazards: a probabilistic integration of empirical and process-based models in the North Cascades of Washington, U.S.A.
Source: Copernicus journal article supplement (doi:10.5194/nhess-2019-104), 2019-04-03
Supplement: Supplementary file [file nhess-2019-104-RC1-supplement.pdf]

# A new approach to mapping landslide hazards: a probabilistic integration of empirical and process-based models in the North Cascades of Washington, U.S.A.

Ronda Strauch<sup>1</sup>, Erkan Istanbuluoglu<sup>2</sup>, and Jon Riedel<sup>3</sup>

1. Seattle City Light, Seattle, WA and Civil and Environmental Engineering, University of Washington, Seattle, WA

2. Civil and Environmental Engineering, University of Washington, Seattle, WA

3. National Park Service, US Dept. of Interior, Sedro-Woolley, WA

Corresponding author:

Ronda Strauch  
Seattle City Light  
700 5th Ave #3316, Seattle, WA 98124  
Tel: 425-445-7934  
E-mail: [ronda.strauch@seattle.gov](mailto:ronda.strauch@seattle.gov)

## Keywords:

Landslide, frequency ratio, hazard, North Cascades, geomorphology, debris avalanche

## Abstract

We developed a new approach for mapping landslide hazard by combining probabilities of landslide impact derived from a data-driven statistical approach and process-based model of shallow landsliding. Our statistical approach integrates the influence of seven site attributes on observed landslides using a frequency ratio method. Influential attributes and resulting susceptibility maps depend on the observations of landslides considered: all types of landslides, debris avalanches only, or source areas of debris avalanches. These observational datasets reflect the capture of different landslide processes or components, which relate to different landslide-inducing factors. Slopes greater than 35° are more frequently associated with landslide initiation, while higher landslide hazards at gentler slopes (<30°) reflect depositional processes from observations of all landslide types or debris avalanches. Source areas are associated with mid to high elevations (1,400 to 1,800 m), where they are linked to ecosystem transition (e.g.,

1 forest to barren), while all landslides types and debris avalanches show increasing frequency in  
2 lower elevations (< 1,200 m). Slope is a key attribute in the initiation of landslides, while  
3 lithology is mainly linked to transport and depositional processes. East (west) aspect is a  
4 positive (negative) landslide-influencing factor, likely due to differences in forest cover and  
5 associated root cohesion, and evapotranspiration. The empirical model probability derived from  
6 debris avalanche source area is combined probabilistically with a previously developed  
7 process-based probabilistic model to produce an integrated probability of landslide hazard for  
8 initiation that includes mechanisms not captured by the infinite slope stability model. We apply  
9 our approach in North Cascades National Park Complex in Washington, USA, to provide  
10 multiple landslide hazard maps that land managers can use for planning and decision making, as  
11 well as educating the public about hazards from landslides in this remote high-relief terrain.

## 12 **1 Introduction**

13 Most mountain ranges are susceptible to landsliding due to their steep geomorphology, loose soil  
14 development, geology, and high precipitation (e.g., Coe, 2016). Landslides disrupt aquatic  
15 habitats (May et al., 2009; Pollock, 1998), damage infrastructure such as roads, utilities, and  
16 dams (Ghirotti, 2012; Baum et al., 2008), and harm people (Wartman et al., 2016; Taylor and  
17 Brabb, 1986). Landslide hazards are expected to increase globally with growing extremes in the  
18 climate (Coe, 2016; Haerberli et al., 2016; Crozier 2010).

19  
20 Maps of landslide hazards, quantified as a probability of landslide initiation or impact, can be  
21 obtained using empirical methods that statistically relate the location of existing landslides to  
22 other environmental variables and process-based models based on geotechnical slope stability  
23 equations driven by hydro-climatic inputs (Bordoni et al., 2015; Mancini et al., 2010; Sidle and  
24 Ochiai 2006; El-Ramly, et al., 2002). While detailed quantitative and categorical climatic,  
25 geologic, ecologic, and pedologic information can be used in statistical models, process-based  
26 models are limited to geotechnical stability analysis driven by soil pore-water pressure, and often  
27 neglect geological factors such as bedrock, faulting, and complexities of microclimatic  
28 conditions. To date, data-driven empirical research on landslide hazard mapping (Corominas et  
29 al., 2012; Lee 2007; Chung and Fabbri 2002) has been typically conducted independently from  
30 hydroclimate-driven modeling of landslides that largely focus on hydrologic controls on  
31 landsliding (Wooten et al., 2016; Cevasco et al., 2014). There is need for unifying these two lines  
32 of research to provide regional scale landslide prediction for resource management and hazard  
33 mitigation strategies. In this paper we develop a statistical approach to combine probability of  
34 landslide initiation obtained from an observation-based statistical mapping method and a  
35 process-based model. The proposed approach is illustrated in the North Cascades region of the  
36 state of Washington, USA.

37  
38 Data-driven statistical landslide susceptibility approaches assess the inherent or quasi-static  
39 stability of hillslopes derived from statistical associations (e.g., correlations) between site  
40 attributes (e.g., soil, geology, topography) and an inventory of past landslides that includes  
41 landslide type and locations (e.g., Dai and Lee, 2002; Gupta and Joshi, 1990; Pachauri and Pant,  
42 1992; Kirschbaum et al., 2012). These models focus on prevailing conditions that predispose  
43 hillslopes to failure (Hungr et al., 2014), typically providing general indices of relative landslide  
44 susceptibility or spatial probabilities applicable to the study location and cannot represent causal

1 factors or triggering conditions that change in time (van Westen et al., 2006; Sidle and Ochiai,  
2 2006). Outcome of such analyses depend on the completeness of observations, hindering the use  
3 of such techniques over large areas where complete inventories are typically lacking. Since  
4 empirical models are based on observation of past landslides, the preconditioning relationships  
5 are assumed to prevail into the future until an updated study is completed (Lepore et al., 2012).

6  
7 Process-based models require considerable data on the spatial-temporal characteristics of the  
8 landscape and triggering hydro-meteorologic events. These models are also usually restricted to  
9 a specific type of landslide and can be limited in representing local geologic, soil, and hydrologic  
10 conditions that may be difficult to observe and map in the field and parameterize in model  
11 theory. Data-driven statistical methods could be used to condition process-based model results  
12 to incorporate the influence of environmental and geologic factors that are not represented in  
13 process theory. Linking these empirically-based and process-based models may improve the  
14 spatial-temporal patterns of landslide hazard at medium to large scales where landslide  
15 inventories exist to provide support tools for authorities addressing risk management.

16  
17 This paper describes research designed to address the following questions: 1) How can we  
18 quantify relative contributions of local topography, geology, and ecology on landslide frequency  
19 and derive spatial probabilities of landsliding using a statistical model? 2) How would  
20 probabilities of landslide initiation derived from empirical observations compare with those  
21 derived from a process-based model? 3) How can we combine empirical and process-based  
22 models for landslide susceptibility to improve the prediction of landslide hazards?

23  
24 The empirical approach for landslide susceptibility we used is based on a modification of the  
25 Frequency Ratio (FR) statistical concept which has been found to perform as well as more  
26 rigorous statistical approaches such as logistic regression (Hong et al., 2017; Wu et al., 2017;  
27 Bellugi et al., 2015; Lepore et al., 2012; Kirschbaum et al., 2012; Lee and Pradhan, 2007; Lee et  
28 al., 2007). As for the mechanistic model, we used the results of Strauch et al. (2018), who  
29 developed a Monte Carlo solution of the infinite slope stability equation coupled to a steady-state  
30 topographic flow routing approach to map annual probability of shallow landsliding. The  
31 uncertainty of soil depth in Strauch et al. (2018) was constrained by a soil development model,  
32 and subsurface flow recharge was obtained from a regional macro-scale hydrologic model that  
33 produced historical hydrologic simulations (Hamlet et al., 2013).

34  
35 Building on the advantages from the empirical and process models, we combined the two models  
36 to develop a map of landslide hazard. The integrated map can be developed to identify landslide  
37 hazards that may originate from either the initiation of landslides or the transport and deposition  
38 (i.e., runout) of the landslide material (Fig. 1). The organization of this paper is as follows. Our  
39 methodology is discussed in Sect. 2, including the empirical method, model application, data  
40 compilation, and model integration approach. Section 3 details our results of the empirical  
41 application and integrated hazard model as well as various hazard maps developed. We end with  
42 some overall concluding thoughts in Sect. 4.

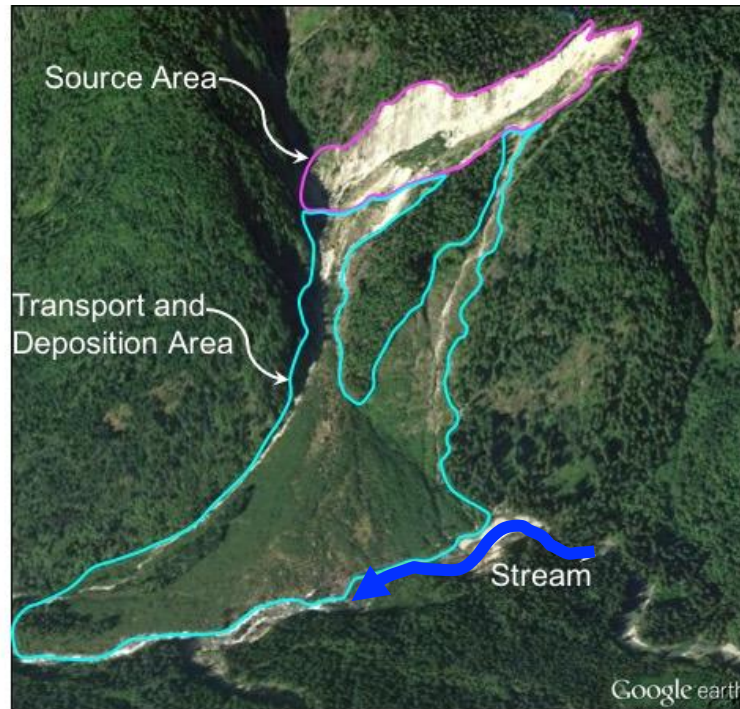

1  
2 **Figure 1.** Primary landslide features showing source, transport, and deposition areas illustrated over aerial  
3 image from Google Earth taken July 2016. Location in North Cascades National Park Complex about 4  
4 km north of Newhalem, Washington. Source: Google Earth, 48°41'55.72" N 121°17'01.31" W, imagery  
5 data 12/30/2010.

## 6 **2 Methodology**

### 7 2.1 Frequency Ratio

8 We characterized the susceptibility of hillslopes to landslides using an empirically-based  
9 Frequency Ratio, FR, approach (Lee et al., 2007; Kirschbaum et al., 2012). We used the term  
10 landslides broadly, covering all types of mapped landslides in our landslide inventory, with their  
11 source, transport and depositional zones (Fig. 1). The FR approach relates the density ratio of  
12 historical landslides within selected surface attributes, SAs. We considered seven SAs in our  
13 analysis: slope, elevation, aspect, curvature, land use-land cover (landcover), lithology, and  
14 topographic wetness index.

15 Slope, curvature, and lithology directly affect the forces and geotechnical properties in surface  
16 sediments. Land cover provides a surrogate for root cohesion and topographic wetness index has  
17 been used as a surrogate for soil pore water pressure (Borga et al., 2002). Elevation can  
18 represent the effects of climate, weathering, vegetation, ground motion, and glacial processes, if  
19 any, as well as coincide with variability in slope, soil depth, and land use (Sidle and Ochiai,  
20 2006). Aspect provides an indication of solar insolation, vegetation type and cover density, snow  
21 and ice loading, and soil moisture levels via evapotranspiration (Beatty, 1956; Gokceoglu et al.,  
22 2005).

23 Each SA is indexed by attribute type, m (e.g. m=slope, lithology, vegetation), and its subcategory  
24 is indexed by n. Subcategories of each SA can be a categorical variable such as type of lithology,

1 soil and vegetation, or a quantitative variable defined with certain ranges such as slope and  
 2 aspect over the study domain, SD. For a given SA, identified by  $m$ , and its subcategory,  $n$ ,  
 3  $FR_{m,n}|SA_{m,n}$  is calculated (Eq. 1) as the ratio of observed landslide area,  $LA$ , in each SA  $m$  and  
 4 subcategory  $n$  ( $LA_{SA_{m,n}}$ ) with respect to the area of the  $SA_{m,n}$  ( $A_{SA_{m,n}}$ ) to the regional landslide  
 5 density,  $P_o$  (Eq. 2) (Miller and Burnett, 2007):

$$6 \quad FR_{m,n}|SA_{m,n} = \frac{LA_{SA_{m,n}}/A_{SA_{m,n}}}{P_o} \quad (1)$$

$$7 \quad \text{where } P_o = \frac{LA_{SD}}{A_{SD}} \quad (2)$$

8 The term in the numerator of Eq. (1) gives an empirical probability of landsliding impact within  
 9  $SA_{m,n}$ .  $P_o$  can also be referred to as a regional background probability, such that in absence of  
 10 any other information,  $P_o$  represents the probability of landsliding at any point in the domain.  
 11 The interpretation of FR is as follows (Lepore et al., 2012):

- 12 •  $FR < 1$ : indicates proportionally less landslide area with subcategory  $n$  of SA  $m$ ,  $SA_{m,n}$ ;  
 13 hence, smaller odds of a landslide than in the entire SD.
- 14 •  $FR = 1$ : means there is the same proportion of landslide area with  $SA_{m,n}$  as in the SD thus,  
 15 the odds of a landslide are the same for the  $SA_{m,n}$  subcategory as the SD.
- 16 •  $FR > 1$ : reveals a higher percentage of landslide area with  $SA_{m,n}$ , than in the entire SD,  
 17 so there is a propensity for failures to occur with this SA.

18  
 19 FR in Eq. (1) is developed for a population of spatially distributed locations that has the same  
 20 attribute of a given  $SA_{m,n}$ . A given point on the landscape would have as many FR values as the  
 21 number of SAs used. To develop an index that will incorporate all the FR values for a given  
 22 point on the landscape we used an empirical susceptibility index,  $SI$ , defined at the grid cell  
 23 scale,  $SI_c$ , as the product of the FR values for all SAs of that grid cell and their associated  
 24 subcategory,

$$25 \quad SI_c = \prod^m FR_{m,n}|SA_{m,n}. \quad (3)$$

26  
 27  
 28 A multiplicative FR is used because in certain subcategories, there may be no landslide  
 29 observations (e.g., low slope angle), and in such cases the hillslope would be stable regardless of  
 30 other soil and vegetation properties.  $SI_c$  is a measure that relates local static (or slowly changing)  
 31 site characteristics to relative frequency of landslides. Since  $SI_c$  is a data-driven index,  
 32 probability of landsliding would increase as  $SI$  grows.

33  
 34 In order to develop a continuous relationship between  $SI_c$  and probability of landslide at a grid  
 35 cell,  $P(LS_c|SI_c)$ , we binned the population of  $SI_c$  values across the landscape into  $SI_r$  bins, where  $r$   
 36 is the number of  $SI$  bins. We then estimated the probability of landsliding for an  $SI$  bin,  $SI_r$ ,  
 37  $P(LS_r|SI_r)$ , as the ratio of number of grid cells with landslides in each  $SI$  bin,  $N(LS)_r$ , to the total  
 38 number of grid cells within each  $SI$  bin,  $N_r$  (Eq. 4).

$$39 \quad P(LS_r|SI_r) = \frac{N(LS)_r}{N_r} \quad (4)$$

1  
2 To calculate spatially continuous empirical probability of landsliding at each grid cell of a DEM,  
3  $P(LS_c|SI_c)$ , we fit empirical functions that relate  $P(LS_r|SI_r)$  to  $SI_r$ . These functions are then used  
4 for mapping empirical probability of landsliding at the cell scale,  $P(LS_c|SI_c)$ , based on its  
5 empirically-derived  $SI_c$  value in Eq. (3).  
6

7 We included all SAs to develop empirical models relating SI to landslide probability, similar to  
8 Kirschbaum et al. (2012) and Lepore et al. (2012). We repeated the analysis described above  
9 three times: first, considering all landslide types and including their source, transport, and  
10 depositional zones, as is commonly done in multi-factor analyses (Sidle and Ochiai, 2006;  
11 Ayalew et al., 2004; Carrara et al., 1995); second, focusing on debris avalanches, with all three  
12 of their zones (Fig. 1); and third, considering only the source (initiation) areas of debris  
13 avalanches, identified as the upper 20% of elevation within mapped debris avalanche polygons.  
14 This tiered approach can be used to quantify the relative contributions of different landslide  
15 features to overall landslide hazard in a region.  
16

## 17 2.2 Model Integration

18 Here we develop a method to combine the empirical probability for landslide initiation based on  
19 SI,  $P(LS_c|SI_c)$ , with the probability of landslide initiation based on a Monte Carlo solution of the  
20 infinite slope stability model that evaluates localized (model grid cell) factor of safety (FS),  
21  $P(FS_c \leq 1)$  using Landlab (Strauch et al., 2018; Hobbey et al., 2017). In combining probabilities,  
22 we focus on the landslide *initiation* areas, as the process-based model we used would only be  
23 applicable for landslide initiation. Empirical  $P(LS_c|SI_c)$  and modeled  $P(FS_c \leq 1)$  probabilities of  
24 landslide impact at each cell defined across the landscape are treated as indices representing the  
25 likelihood of landslides. The method we proposed for an integrated probability uses the cell  
26 count of observed landslide initiation points within bins of the empirical,  $P(LS_c|SI_c)_b$ , and  
27 modeled probability,  $P(FS_c \leq 1)_b$  of landsliding.  
28

29 If we treat the empirical probability as an index, the probability of landslide initiation within a  
30 bin  $j$  of empirically-derived probability of landslide initiation,  $E_j = P(LS_c|SI_c)_{b,j}$  is calculated as:

$$31 \quad P(LS|E_j) = \frac{N(LS)_j}{N_j} \quad (5)$$

32 where,  $N(LS)_j$  is the number grid cells with observed landslides and  $N_j$  is the number of grid  
33 cells both in bin  $j$  of  $E_j$ ;  
34

35 Similarly, the probability of landslide initiation within a bin  $i$  of processed-based modeled  
36 probability of landslide initiation,  $M_i = P(FS_c \leq 1)_{b,i}$  is calculated as:

$$37 \quad P(LS|M_i) = \frac{N(LS)_i}{N_i} \quad (6)$$

38 where,  $N(LS)_i$  is the number of grid cells with observed landslides and  $N_i$  is the number of grid  
39 cells both in bin  $i$  of  $M_i$ . If the observed landslide data is representative of the actual landslide  
40 frequency over the duration when the probability of landsliding is modeled, an ideal model that

1 correctly represents all environmental variables associated with landslide initiation would give  
2  $P(LS|M_i) = M_i$ . Assuming unbiased landslide mapping in the field, a greater difference  
3 between these two relative frequency probabilities would suggest a weaker model representation  
4 of the process, especially when the process-based model is run to represent landslide risk for a  
5 given climatology.

6  
7 Modeled probabilities may be improved when information contained in empirical probabilities is  
8 introduced. The probability of landslide initiation in areas shared by any two select bins (e.g., co-  
9 bins) of empirically-derived,  $E_j$ , and process-based modeled,  $M_j$ , probabilities is calculated as the  
10 joint probability:

$$11 \quad P(LS|E_j \cap M_i) = \frac{N(LS)_{j,i}}{N_{j,i}} \quad (7)$$

12 where  $N(LS)_{j,i}$  is the number grid cells with observed landslides and  $N_{j,i}$  is the number of grid  
13 cells in the *joint* bin  $j$  of empirical probability and bin  $i$  of modeled probability data. An  
14 illustration of this estimation is given in Figure 2. The conceptual example shows how relatively  
15 low landslide probability predictions by a process model in the  $M_i=0-0.2$  bin range can be  
16 modified due to differences in the empirical preconditioning of the landscape (e.g., rock type) to  
17 landslides represented in  $E_j$ . The intersection of  $M_i=0-0.2$  with  $E_j=0.2-0.3$  yields a higher  
18 empirical probability of landsliding. Influence of vegetation change and extreme weather events  
19 (e.g. Eco-hydrometeorologic controls) that were not part of the initial empirical data set used for  
20 estimating  $E_j$  bins can be captured by the process-based model. In this case the model predicts a  
21 high probability  $M_j=0.8-1$ , while  $E_i$  remained in the low probability range in  $E_i=0.0-0.1$ . The  
22 intersection of  $M_j$  and  $E_i$  land surface characterization captures the landscape where landslides  
23 were observed.

24  
25  
26

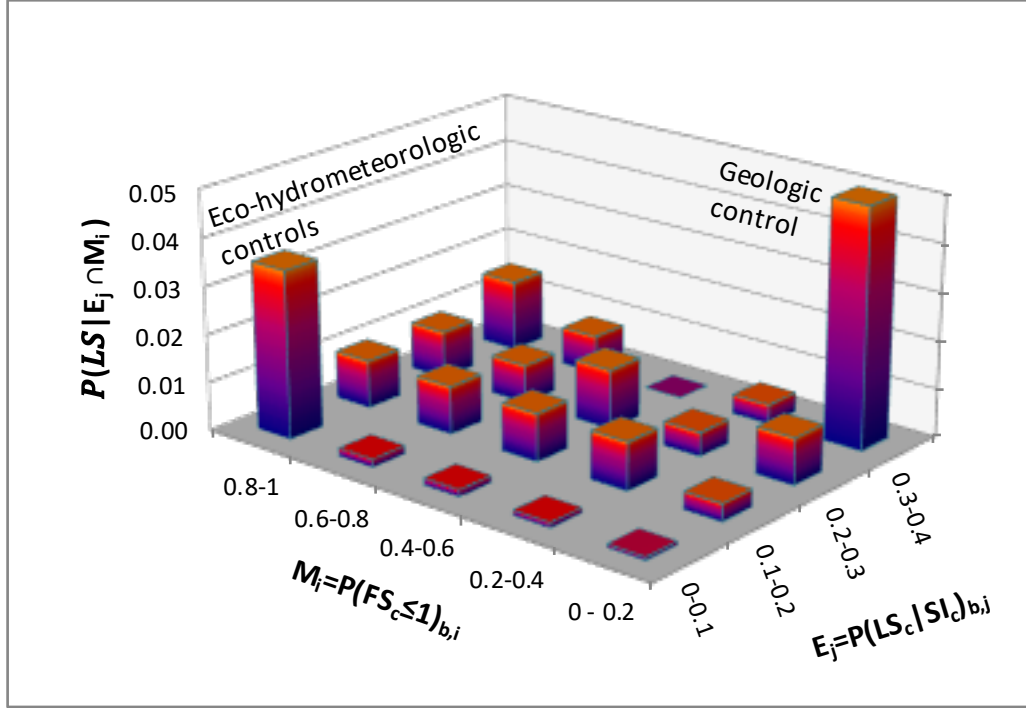

**Figure 2.** Illustration of the proposed landslide probability conditioned on estimated spatially distributed SI-based empirical and modeled probabilities as binned indices,  $E_j$  and  $M_i$ , that form a joint space.  $P(LS|E_j \cap M_i)$  is defined as the ratio of the number of landsliding cells to the number of cells that jointly fall into given  $E_j$  and  $M_i$  bins.

We propose that the ratio of  $P(LS|E_j \cap M_i)$  and  $P(LS|M_i)$  can be used as a correction to  $P(FS_c \leq 1)$ . As model predictions improve, this ratio should get closer to 1, especially when the model is used to map landslide probability for a given climatology in a region. When the process-based model is run for studying a specific rainfall event, this ratio quantifies the relative roles of other factors could play on landslide initiation. Thus, we propose that the probability of landsliding at each grid cell,  $c$ , given the corresponding  $M_j$  and  $E_i$  bins that a cell belongs to can be estimated as:

$$P(LS)_{c,j,i} = P(FS_c \leq 1) \times \frac{P(LS|E_j \cap M_i)}{P(LS|M_i)} \quad (8)$$

If we let  $\omega$  represent the bin-based ratio on the right-hand side of Eq. (8) as a weighting factor based on observations of landslides, then we can simplify notation to:

$$P(LS)_{c,j,i} = P(FS_c \leq 1) \times \omega \quad (9)$$

This gives the probability of landslide initiation, represented as an *adjusted* modeled probability of landslide initiation at a grid cell given empirical observations correlated with site characteristics. In the reminder of the paper we use  $P(FS_c \leq 1)$  to refer to process-based shallow



1 landslide probability from Strauch et al.(2018) and P(LS) to refer to the adjusted model  
 2 probability using the proposed empirical-adjustment methodology.

3 A hypothetical example shown in Table 1 demonstrates calculating the relative frequencies, the  
 4 resulting calculated weight, and adjusted P(LS) (Eq. 9). The calculation of relative frequency is  
 5 based on binning modeled and empirical probabilities, counting landslide and non-landslide cells  
 6 within each bin, and calculating a weighting term,  $\omega$ , which is then used to adjust the original  
 7 modeled probability given empirical evidence. Weights can be greater than 1 and the final  
 8 probability will be increased when weight  $\geq 1$  and decreased when weight  $< 1$ . Final adjusted  
 9 probabilities are limited to unity in the integrated model. For example, a weight = 2 and modeled  
 10 probability = 0.2 would result in a doubling of the final probability = 0.4 given empirical  
 11 information.

12 **Table 1.** Hypothetical example of calculating relative frequencies, weight, and P(LS) during  
 13 model integration

| $E_j$ bins                                                                                                                                                                                                                                                                                                                                                                                                             | Observed Landslides / Total Cell Count ( <i>relative frequency</i> ) |                        |                |               |               | Total                     |
|------------------------------------------------------------------------------------------------------------------------------------------------------------------------------------------------------------------------------------------------------------------------------------------------------------------------------------------------------------------------------------------------------------------------|----------------------------------------------------------------------|------------------------|----------------|---------------|---------------|---------------------------|
| 0.2-0.3                                                                                                                                                                                                                                                                                                                                                                                                                | 206/<br>870                                                          | 5/<br>24               | 3/<br>14       | 5/<br>14      | 2/<br>10      | 221/<br>932               |
| 0.1-0.2                                                                                                                                                                                                                                                                                                                                                                                                                | 11107/<br>87104                                                      | 309/<br>2001           | 193/<br>1220   | 137/<br>856   | 96/<br>657    | 11842/<br>91838           |
| 0 - 0.1                                                                                                                                                                                                                                                                                                                                                                                                                | 48513/<br>1848950                                                    | <b>1757/<br/>51679</b> | 1157/<br>33084 | 793/<br>24928 | 742/<br>21410 | <b>52962/<br/>1980051</b> |
| Total                                                                                                                                                                                                                                                                                                                                                                                                                  | 59826/<br>1936924                                                    | <b>2071/<br/>53704</b> | 1353/<br>34318 | 935/<br>25798 | 840/<br>22077 | 65025/<br>2072821         |
| $M_i$ bins                                                                                                                                                                                                                                                                                                                                                                                                             | 0-0.1                                                                | 0.1-0.2                | 0.2-0.3        | 0.3-0.4       | 0.4-0.5       |                           |
| An example calculation of P(LS) using the above data – a cell having a modeled probability, $P(FS_c \leq 1) = 0.12$ and an empirical probability, $P(LS_c SI_c) = 0.08$ , then:<br>$P(LS E_j) = 52962/1980051 = 0.027$ (Eq. 5)<br>$P(LS M_i) = 2071/53704 = 0.039$ (Eq. 6)<br>$P(LS E_j \cap M_i) = 1757/51679 = 0.034$ (Eq. 7)<br>$\omega = 0.034/0.039 = 0.87$<br>$P(LS)_{c,i,j} = 0.12 \times 0.87 = 0.105$ (Eq. 9) |                                                                      |                        |                |               |               |                           |

14

15 **2.3 Model application**

16 **2.3.1 Study Area**

17 Our study area is within the geographical limits of North Cascades National Park Complex  
 18 (NOCA) managed by the U.S. National Park Service (Fig. 3). NOCA has experienced damaging  
 19 and disruptive landslides that have impacted infrastructure and disrupted public use of the park.  
 20 NOCA is approximately 2,757 km<sup>2</sup>, with 93% wilderness (e.g., no motorized or mechanized  
 21 devices) (DOI-NPS, 2012), which is ideal for studying landslides primarily triggered by natural  
 22 causes. The north-south oriented Cascade Mountains has an elevation range of 100 to 2,800 m at  
 23 the study site, with jagged bedrock peaks, and over 300 alpine glaciers. The landscape has been  
 24 shaped by Ice Age continental and alpine glaciers, and mass wasting, fluvial and tectonic uplift  
 25 processes that continue today (LaHusen et al., 2016; Mustoe and Leopold, 2014; Collins and  
 26 Montgomery, 2001; Riedel et al., 2007; Pelto and Riedel, 2001). Orographic uplift of Pacific  
 27 Ocean air masses generates a spatial precipitation gradient with an average of 4,575 mm of

1 precipitation falling annually on the highest elevations west of the crest, while lowlands east of  
 2 the crest receive a mean annual precipitation of 708 mm (Mustoe and Leopold, 2014; Roe,  
 3 2005). Air temperatures vary highly depending on season and elevation with the warmest month  
 4 typically August and the coldest month is January; corresponding average daily temperatures of  
 5 about 25° C and 4°C, respectively, for these months in Newhalem, Washington.

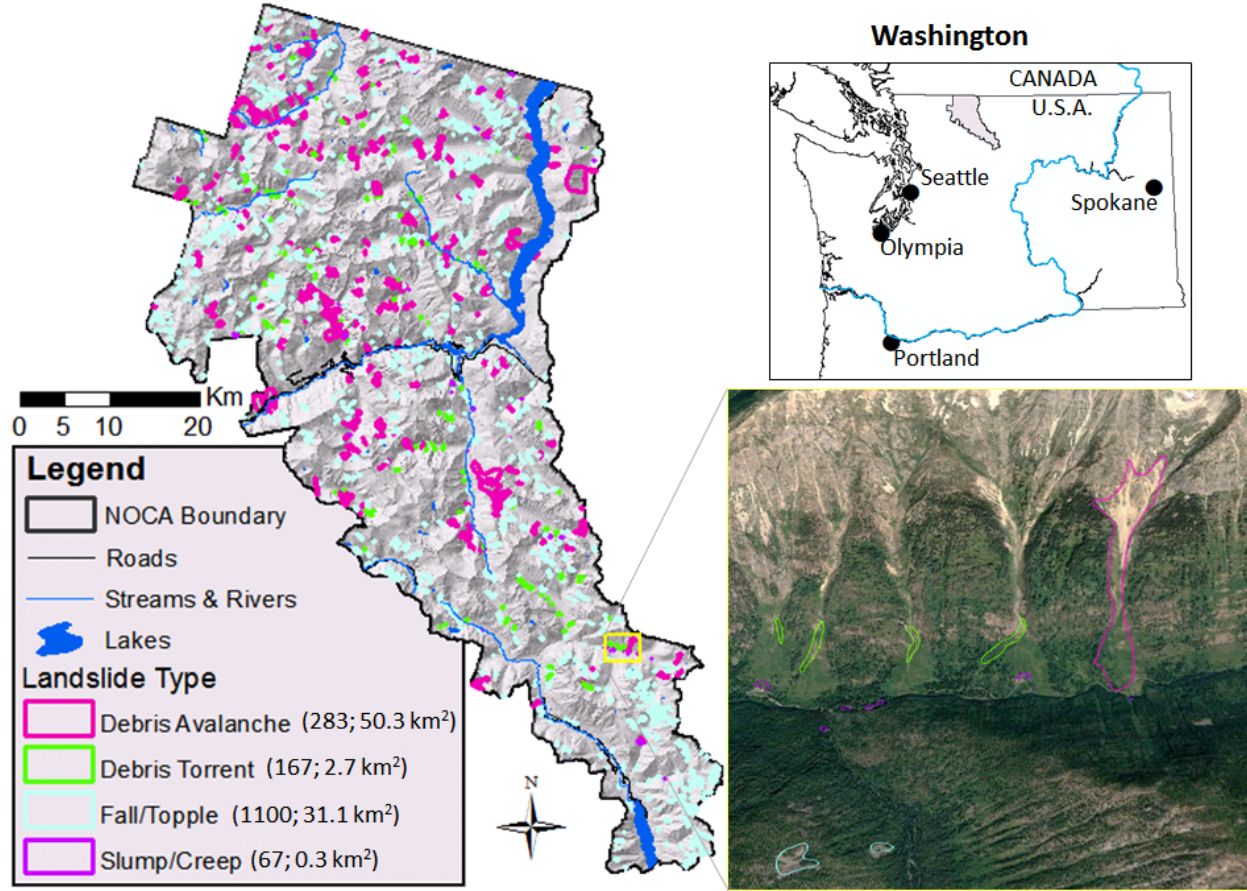

6  
 7  
 8 **Figure 3.** Four landslide types mapped within North Cascades National Park Complex (NOCA) in  
 9 Washington, U.S.A. The number and their total area of each type is given in parentheses. Insert provides  
 10 example of mapping over aerial image from Google Earth, 48°27'20.21" N 120°44'47.09" W, imagery data  
 11 8/27/2006.

12  
 13 Vegetation in NOCA is dominated by forest, particularly coniferous tree species, up to about  
 14 2,000 m (Strauch et al., 2018; Agee and Kertis, 1987). A patchwork of shrubs, herbaceous  
 15 vegetation, and barren land is found above this elevation common in alpine environments and in  
 16 the paths of frequent snow avalanches. Above 2,400 m is mostly bare rock, snow and ice. The  
 17 underlying geology is composed of a primarily old Mesozoic crystalline and metamorphic rock  
 18 originating far to the south (Haugerud and Tabor, 2009).

19  
 20 Landslide (LS) inventory data are the most requisite information needed for an empirical  
 21 statistical analysis (Lepore et al., 2012). Landslides were mapped in the park as discreet  
 22 landforms during a park-wide inventory (Fig. 3; Riedel and Probalá, 2005). Landslides were  
 23 identified using color stereo-pair 1998 air photos at 1:12,000 scale, 7.5 minute topographic maps,

1 bedrock geology maps, and field investigations (e.g., Riedel et al., 2012). The minimum  
 2 mapping unit was approximately 1,000 m<sup>2</sup> except for some smaller slump units. Landslide  
 3 linework was transferred to a digital format, peer reviewed, and polygons edited into final form  
 4 in geographical information system (GIS) software using National Agriculture Imagery Program  
 5 (NAIP) imagery and a 10-m DEM and, in some cases, LiDAR. The landform mapping study  
 6 identified six different types of mass wasting (Table 2): rock fall/topple, debris avalanche, debris  
 7 torrent, slump/creep, sackung, and snow avalanche-impacted landforms (SAILs) (Riedel et al.,  
 8 2012). The single sackung mapped in NOCA represents a gravitational spreading or slope  
 9 deformation, sometimes found near ridge tops. All landslide types were included in the analysis  
 10 except for SAILs, which are created by snow avalanche impacting unconsolidated sediments  
 11 rather than slope instability. There are 1,618 landslides mapped in NOCA: falls/topples (68%),  
 12 debris avalanches (17%), debris torrents (10%), slumps/creeps (4%), and one sackung (<1%)  
 13 (Fig. 3; sackung not shown).

14  
 15  
 16

**Table 2.** Landslides mapped as part of landform mapping study used in hazard analysis  
 (Riedel et al., 2005)

| Type of Mass Wasting    | Process                                                                                                                                                                                        | Mapping                                                                                                            |
|-------------------------|------------------------------------------------------------------------------------------------------------------------------------------------------------------------------------------------|--------------------------------------------------------------------------------------------------------------------|
| Debris Avalanche        | Extremely rapid moving mixture of rock, soil, and vegetation, generally originates from glacially-sourced areas, over-steepened valley walls, and in many cases hydrothermally altered bedrock | Includes headwall scar, path, and deposit                                                                          |
| Debris Torrent          | Channelized rapid and/or sudden flow of material entraining debris stored in stream channel while moving down slope                                                                            | Only the deposition areas within a debris cone                                                                     |
| Slump and Creep         | Slumps - rotational slip of cohesive sediments, usually triggered by undercutting of steep slopes along riverbanks. Creeps - slow movement induced by saturated ground.                        | Mapped where deciduous vegetation brighter on aerial photos, fresh new soil, jackstraw or pistol gripped trees.    |
| Rockfall or Rock Topple | Sporadic and shallow detachment of rock falling from bedrock cliffs and rock towers                                                                                                            | Mapped where bright and highly reflective with little or no vegetation on aerial photos. Mainly deposition mapped. |

17  
 18  
 19  
 20

### 2.3.2 Study domain and Parameters

We constrained our analysis to soil-mantled landscapes by excluding high elevation areas covered by glaciers, permanent snowfields and exposed bedrock, as well as wetlands and other

1 water surfaces, based on landform mapping and maps of lithology and landcover. We also  
2 exclude slopes less than 17° because this slope threshold was found to generally separate  
3 colluvial mass wasting and debris transport processes from fluvial processes in this region  
4 (Strauch et al., 2018). The area included in the analysis covers about 79% of NOCA's land area.  
5

6 The seven site attributes (SAs) investigated using the Frequency Ratio (FR) approach as they  
7 relate to mapped landslide activity vary across the NOCA study area. Slope, total curvature  
8 (Laplacian of elevation), and aspect attributes were derived using ArcGIS from a 30-m digital  
9 elevation model (DEM) acquired from National Elevation Dataset (NED) (USGS, 2014a). A  
10 resolution of 30-m was chosen for comparability with other studies and landslide size (e.g.,  
11 Strauch et al., 2018; Lepore et al., 2012). Elevation ranges from 107 to 2794 m with 85% of the  
12 park between 500 to 2000 m. Subcategories for elevation were based on 200-m increments with  
13 lumping at the ends (e.g., < 400 m and > 2200 m). Slope subcategories were set at 5° increments  
14 with ending subcategories for slopes 17-25°, and >50°. Curvature was divided into three  
15 subcategories: convex/diverging, flat, or concave/converging. Aspect (i.e., facing direction of  
16 slope) was classified into eight compass orientations (i.e., N, NE, E, SE, S, SW, W, NW). The  
17 park's complex topography results in roughly equal distribution among the cardinal and  
18 intercardinal directions of aspect; however, the southwest quadrant is slightly more common.  
19

20 The DEM also provides the information needed to derive a distributed wetness index (Beven and  
21 Kirkby, 1979; O'Loughlin, 1986), calculated as the natural log of the ratio of specific catchment  
22 area [L] to sine of local slope. This index has been used for quantifying the contribution of pore-  
23 water pressure to destabilizing forces in landslide modeling (e.g., Borga et al., 2002; Gokceoglu  
24 et al., 2005). Wetness index was divided into 5 subcategories based on 20% quantiles: low, low-  
25 medium, medium, medium-high, and high wetness. Landcover was acquired from the 2014  
26 National Land Cover Data (NLCD), which is based on 2011 Landsat satellite imagery (Jin et al.,  
27 2013; USGS, 2014b). We categorized this into forest, shrubland, herbaceous, water, wetland,  
28 snow/ice, barren, and developed (e.g., roads, campgrounds). Based on this classification, forest,  
29 shrubs, and herbaceous vegetation represent 54%, 15%, and 10% of the park, respectively.  
30 Barren and snow or ice combined cover 17%, typically at the high elevations. Water and  
31 wetlands cover about 2.5%, while developed is less than 0.5%.  
32

33 Lithology provides a description of rock and deposits that indicates composition, strength, and  
34 age, which can influence the hillslope strength and water redistribution. Washington State  
35 Department of Natural Resources (WADNR) provides lithology in its surface geology maps that  
36 display rocks and deposits as geologic map units (WADNR, 2014). This source of information  
37 was chosen because it is available for all of Washington, facilitating future applications. There  
38 are 48 lithology map unit types within NOCA. These were aggregated into seven subcategories,  
39 based on similarities in origin and generally increasing strength, called: (1) unconsolidated  
40 sediment, (2) ultramafic, (3) weak metamorphic foliated, (4) sedimentary rock, (5) hard  
41 metamorphic, (6) intrusive igneous, and (7) volcanic/extrusive igneous (Table 3). Water and ice  
42 were not classified. Both landcover and lithology were rasterized to the same DEM grid  
43 resolution using ArcGIS based on the dominant type of attribute in each grid cell. Among the  
44 seven types of lithology, hard metamorphic is most common (41% of NOCA), while ultramafic,  
45 sedimentary rock, and volcanic/extrusive igneous combined make up less than 5%.  
46

1 **Table 3.** Classification of Washington Department of Natural Resources surface geology from  
 2 generally weaker (1) to stronger (7) material along with aerial percentages within  
 3 NOCA in parentheses  
 4

| Class                                  | WADNR Lithology                                     | Class                                  | WADNR Lithology                           |
|----------------------------------------|-----------------------------------------------------|----------------------------------------|-------------------------------------------|
| <b>Unconsolidated Sediments (12%)</b>  |                                                     | <b>Sedimentary Rock (2%)</b>           |                                           |
| 1                                      | alluvial fan deposits                               | 4                                      | sedimentary deposits or rocks, undivided  |
|                                        | alluvium                                            |                                        | continental sedimentary deposits or rocks |
|                                        | alluvium, older (e.g., alluvial fans & talus)       |                                        | marine metasedimentary rocks              |
|                                        | alpine glacial drift, Fraser-age                    |                                        | marine sedimentary rocks                  |
|                                        | alpine glacial till, Fraser-age                     | <b>Hard Metamorphic (41%)</b>          |                                           |
|                                        | glacial outwash, alpine, Fraser-age                 | 5                                      | banded gneiss                             |
|                                        | continental glacial drift, Fraser-age               |                                        | mixed metamorphic and igneous rocks       |
|                                        | mass-wasting deposits                               |                                        | orthogneiss                               |
|                                        | mass-wasting deposits, mostly landslides            |                                        | paragneiss                                |
|                                        | mass-wasting deposits, not landslides               | <b>Intrusive Igneous (21%)</b>         |                                           |
|                                        | peat deposits                                       | 6                                      | acidic (felsic) intrusive rock            |
|                                        | talus deposits                                      |                                        | basic (mafic) intrusive rocks             |
| <b>Ultramafic (0.02%)</b>              |                                                     |                                        | diorite                                   |
| 2                                      | ultrabasic (ultramafic) rocks ( <i>serpentine</i> ) |                                        | gabbro                                    |
| <b>Weak Metamorphic Foliated (14%)</b> |                                                     |                                        | granite                                   |
| 3                                      | heterogeneous metamorphic rocks                     |                                        | granodiorite                              |
|                                        | hetero. metamorphic rocks, chert bearing            |                                        | Intermediate intrusive rocks              |
|                                        | marble                                              |                                        | Intrusive breccia                         |
|                                        | metasedimentary and metavolcanic rocks              |                                        | quartz diorite                            |
|                                        | metasedimentary rocks                               |                                        | quartz monzonite                          |
|                                        | metasedimentary rocks, cherty                       | tonalite                               |                                           |
|                                        | metavolcanic rocks                                  | <b>Volcanic/Extrusive Igneous (2%)</b> |                                           |
|                                        | amphibolite                                         | 7                                      | tuffs and tuff breccias                   |
| phyllite, low grade                    | dacite flows                                        |                                        |                                           |
| schist, low grade                      | rhyolite flows                                      |                                        |                                           |
| --                                     | Water and Ice (7%)                                  |                                        | volcanic breccia                          |

5 **3 Results and Discussion**

6 3.1 Frequency Ratio Analysis

7 The results of the FR analyses for each site attribute (SA) are presented in Fig. 4. We discuss the  
 8 role of SA starting with debris avalanche source areas as they are hypothesized to represent the  
 9 initiation processes of shallow landslides that transform into debris avalanches. The SAs that  
 10 impact shallow landslide initiation could arguably play common controls on the initiation of  
 11 other types of slope failures. The frequency analysis shows a clear and growing control of local  
 12 slopes greater than 35° on landslide initiation, which can be considered as the internal friction  
 13 angle of cohesionless sand (Fig. 4c).  
 14

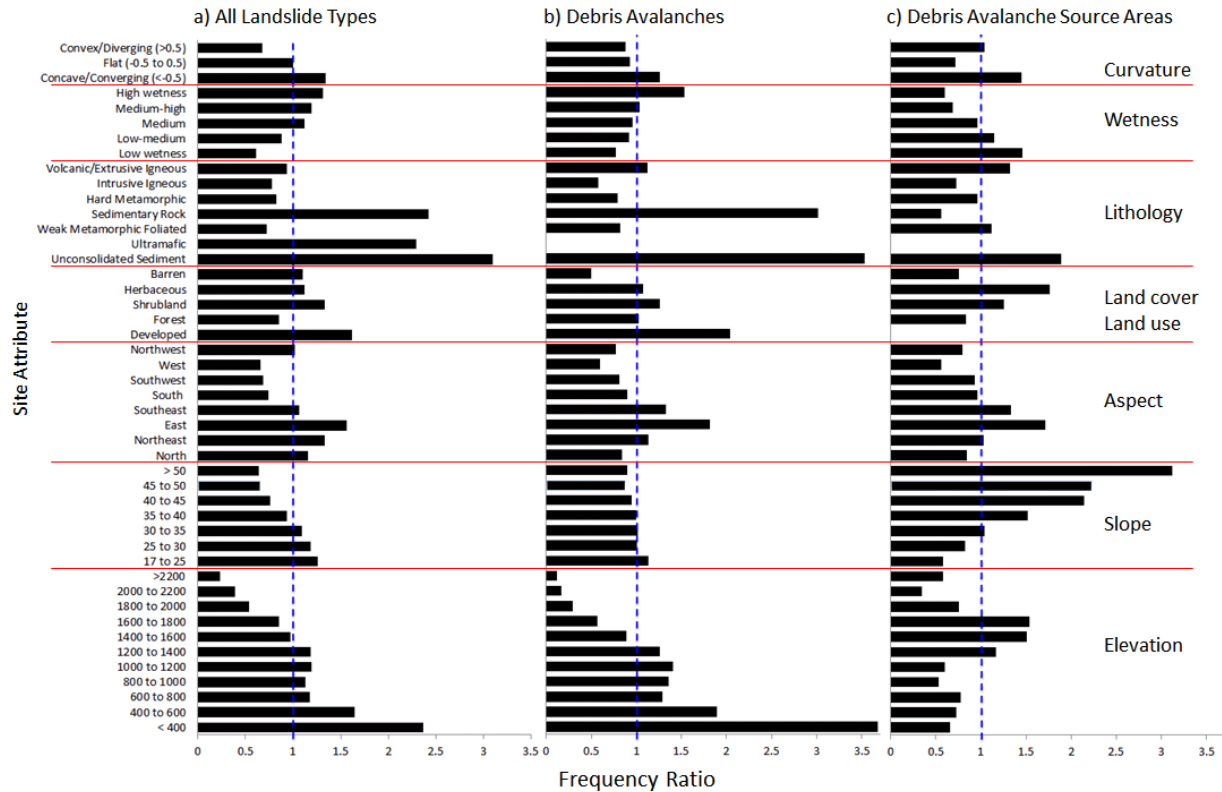

1  
2 **Figure 4.** FR value for different bins of seven Site Attributes (SA) separated by red lines, based on (a) all  
3 landslide types mapped within the NOCA study domain, (b) debris avalanche landslide types only, and  
4 (c) source areas of debris avalanches represented by the highest 20% of the mapped debris avalanche.  
5 The vertical blue line refers to the FR value of 1.0, denoting when no association is found with mapped  
6 landslides. FR values below this line are attributes less likely associated with landslides and FR values  
7 above this line indicate greater association with landslides.

8  
9 The source area of debris avalanches is only about 17% of the mapped debris avalanche area and  
10 10% of the whole landslide inventory, which predominantly maps transport and depositional  
11 areas. A small debris avalanche source area in steep terrain can lead to large landslide impacts in  
12 lower elevations, as the eroded material travels downhill and deposits in gentler gradients (Fig.  
13 1). Thus, the runout zones of debris avalanches and other mapped landslide types cover more  
14 area at gentler slopes typical of lower elevations. This process is captured in Fig. 4a and 4b  
15 where the FR analyses exhibit higher landslide hazard at gentler slopes (<30°), more likely  
16 associated with transport and depositional processes as well as failure of side slopes along  
17 glacially incised U-shaped valleys undercut by fluvial activity. Others have reported clustering of  
18 landslide impacts in lower elevations within valleys where hillslopes are steep enough to fail  
19 (Megahan et al., 1978; Kelsey, 1988; Densmore et al., 1997; Chalkias et al., 2014).

20  
21 In the study area, local slopes generally increase on average with elevation, particularly above  
22 1,400 m (Strauch et al., 2018). The control of steeper slopes on debris avalanche initiation is  
23 supported by the results for elevation where source areas are associated with mid to high  
24 elevation (1,400 to 1,800 m) and entire debris avalanches and all landslides types, including  
25 deposition zones, have growing frequency in lower elevations (< 1,200 m) with the highest

1 frequency falling in elevations <400 m (Fig. 4a, b). Further increase in slopes typically lead to  
2 bedrock exposure and barren lands with thin soil (Strauch et al., 2018; Gabet, 2003). In addition  
3 to steepening slopes, the observed higher frequency of debris avalanche source areas in the mid-  
4 to-high elevation range corroborates recent findings of an ecosystem transition control on  
5 landslide initiation (Strauch et al., 2018). With the cooling of air temperatures beyond forest  
6 ecosystem thresholds, the transition of forest vegetation (predominant alpine conifers) to mixed  
7 shrub and herbaceous vegetation types with lower root cohesion, lead to higher landslide  
8 frequency at debris avalanche source areas (Fig 4c). The slope and elevation results, however,  
9 are likely influenced by the mapping approach, which was biased in mapping landslide activity  
10 on the lower portions of hillslopes that were typically more accessible, and continuous creep and  
11 rapid slides in subalpine and alpine areas were infrequently mapped.  
12

13 Developed areas that include impervious surfaces, constructed materials, and lawns have the  
14 highest landcover association with all mapped landslide areas, as well as with debris avalanches,  
15 yet no association with debris avalanche source areas, which are typically higher on mountains  
16 and rarely developed. Although dirt roads have been found to disrupt drainage and increase  
17 erosion (Croke and Hairsine, 2006; Montgomery, 1994; Swanson and Dyrness, 1975), these  
18 impacts are not evident in NOCA based on the scarcity of roads. In general, forest and barren  
19 landcover show the least landslide activity compared to other landcover (Fig. 4). The forest  
20 association likely indicates the positive contribution of root cohesion to hillslope stability,  
21 whereas the barren landcover type results may indicate the effect of mapping completeness or  
22 hillslope processes. The barren results appear counter to the findings of the processed-based  
23 landslide model applied at the same location, which found high probability of landslide initiation  
24 in barren areas often below retreating glaciers (Strauch et al., 2018). Barren includes areas of  
25 bedrock, glacial debris, and other accumulations of earthen material with vegetation generally  
26 accounting for less than 15% of total cover; thus, there may be a variety of stability conditions  
27 within this single cover class.  
28

29 The sources of debris avalanches are linked to eastern and southeastern aspects (Fig. 4c); 20%  
30 and 15% of source cells by area occur on these aspects, respectively. Except for western aspects  
31 that show the weakest association debris avalanches, other aspects show landsliding frequency  
32 close to the average frequency in the whole study domain. Vegetation type and cover that relate  
33 to root strength and moisture regime can be related to aspect. East and south exposures have  
34 lower forest cover fractions compared to other aspects at mid to lower elevations (< 1,400 m),  
35 and forests are largely replaced by barren lands and shrub and herbaceous vegetation as elevation  
36 increases (Fig. 5). Most source areas of debris avalanches and debris avalanches as a whole are  
37 associated with shrub and herbaceous vegetation types (Fig. 4b,c). Other aspects, especially  
38 west-facing slopes have higher fraction of forest cover (Fig. 5), likely linked to a longer growing  
39 season (Evans and Fonda 1990). Lower landslide frequency in western aspects can be a result of  
40 higher root cohesion of forest vegetation compared to shrub and herbs. Additionally, perhaps  
41 west-facing aspects experience more arid moisture regimes or bedrock bedding, jointing, or  
42 fracturing conducive to stability compared to other exposures (Carson and Kirby, 1972; Fischer  
43 et al., 2006).

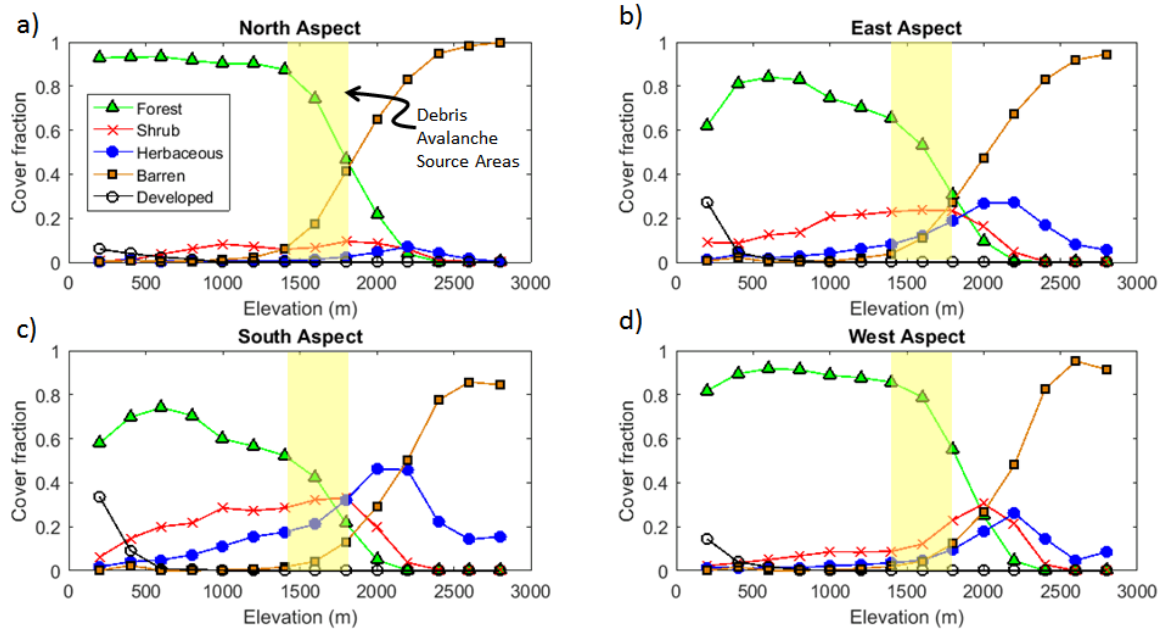

1  
 2 **Figure 5.** Vegetation cover fraction in NOCA on each aspect, taken as the fraction of vegetation type  
 3 within each 200-m elevation band. Aspects categorized here as **a)** north ( $0^{\circ}$  to  $45^{\circ}$  and  $315^{\circ}$  to  $360^{\circ}$ ), **b)**  
 4 east ( $45^{\circ}$  to  $135^{\circ}$ ), **c)** south ( $135^{\circ}$  to  $225^{\circ}$ ), and **d)** west ( $225^{\circ}$  to  $315^{\circ}$ ), covering 23%, 23%, 26%, and  
 5 28% of NOCA, respectively. Yellow highlighted area represents the strongest elevation association for  
 6 debris avalanche source areas.

7 When all landslides are considered, northern slopes exhibit growing landslide association while  
 8 landslide frequency declines in southeastern slopes (Fig. 4a, b). North-facing slopes have been  
 9 documented to retain more soil moisture than south-facing aspects in northern latitudes (Geroy et  
 10 al., 2011), which can be broadly responsible for more initiation, transport and deposition impact  
 11 of all mass wasting types. Hillslope asymmetry (i.e., steeper slopes depending on aspect) was  
 12 not found during inspection of average slope on the four primary aspects. North-south  
 13 asymmetry has been found to demonstrate reversal based on elevation and at  $49^{\circ}$  latitude, which  
 14 correspond to the northern edge of NOCA (Poulos et al., 2012). In general, the relatively similar  
 15 aspect associations for different landslide observation datasets likely indicates the connection of  
 16 source areas to downstream processes of transport and deposition (Fig. 1).

17  
 18 Comparisons among all landslides, whole debris avalanches, and debris avalanche source areas  
 19 clearly show that unconsolidated sediments, largely derived from transport and depositional  
 20 processes, have stronger association with landslides than other lithologies followed by  
 21 sedimentary rock (Fig. 4). This strong association is expected given the inclusion of mass  
 22 wasting landforms in the classification of unconsolidated sediment. The high ultramafic rock  
 23 association when considering all landslide types is driven by a single topple/fall occurring in this  
 24 scarce lithology ( $<0.02\%$  of NOCA). Widespread observation of debris avalanche source areas in  
 25 all rock types may point to the role of steep slopes regardless of lithology. For debris avalanche  
 26 processes, sedimentary rock is more associated with transport and depositional areas than source  
 27 areas. Areas without landslide activity were associated with weak metamorphic foliated and  
 28 intrusive igneous lithology (Fig. 4a).

29



1 The association of landslides on concave/converging versus convex/diverging topography is  
2 relatively consistent among the datasets and generally consistent with literature due to enhanced  
3 wetness where vegetative support may be weak in deeper soils (see Hales et al., 2009; Fig. 4).  
4 High wetness index is associated with landslides for all landslide types as well as entire debris  
5 avalanches (Fig. 4a,b). This result is intuitive as this index is an indicator of increased soil  
6 saturation and surface runoff. In contrast, source areas were correlated with low wetness index  
7 (Fig. 4c). This counterintuitive finding, however, aligns with previously discussed results that  
8 source areas are associated with loss of root strength, steep slopes and higher elevations,  
9 resulting in relatively small specific catchment areas. By definition, wetness index is negatively  
10 correlated with slope and positively correlated with specific contributing area. Thus, source  
11 areas will have a low wetness index when they are from steep slopes with small contributing  
12 areas (i.e., located higher up on hillslopes).

13

### 14 3.2 Susceptibility Index

15 A susceptibility index (SI) is calculated for each grid cell within the study area domain by  
16 equation (3). Cumulative distributions for SI, plotted as fraction of area of the study domain as  
17 well as only in the areas where landslide impact was mapped show higher SI values for a given  
18 fraction of the respective domains where a given SI is exceeded (Fig. 6a, d, and g). Additional  
19 support beyond the graphics that these distributions are not equal is provided by the  
20 Kolmogorov-Smirnov test, which rejects the null hypothesis of equal distributions at  $\alpha < 0.01$ . The  
21 cumulative distributions show that the SI calculated from FR method can differentiate mapped  
22 landslide locations from non-landslides with a larger SI. The resulting spatial distribution of SI is  
23 right skewed as shown in the relative frequencies of SI for all three landslide datasets (Fig. 6b, e,  
24 and h). The right skew indicates that there is a small population of grid cells with high SI  
25 compared to the majority of grid cells in the study domain. This occurs when there are FR  
26 subcategories frequently associated with landslides coinciding at the same location. Histograms  
27 show a greater relative frequency of landslide grid cells with high SI values than the entire  
28 domain (Fig. 6b, e, and h). For source areas, SI bins for the histograms were larger (e.g., 0.5 vs  
29 0.25) due to the small number of source area cells compared to the two other datasets.  
30

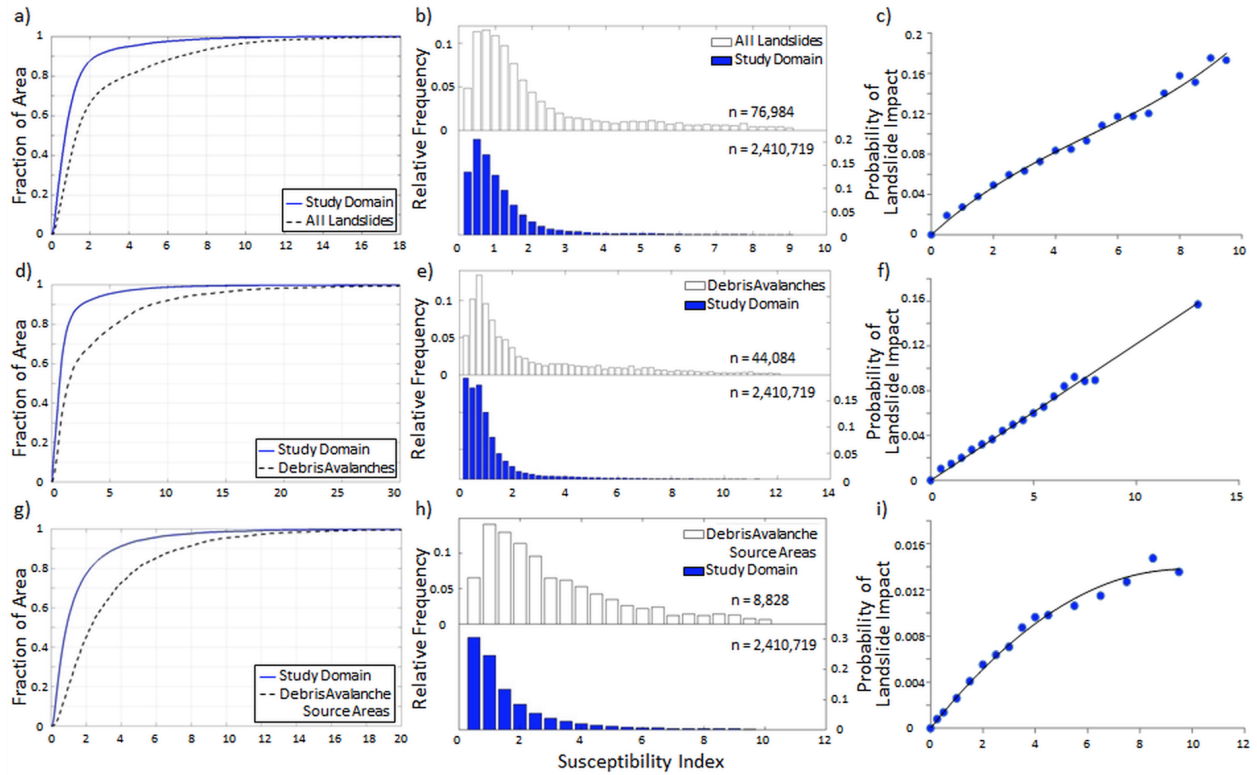

1  
2 **Figure 6.** Cumulative distributions (*a, d, and g - column 1*) and relative frequency plots (*b, e, and h -*  
3 *column 2*) of Susceptibility Index (SI) for *all* grid cells included in the analysis and the grid cells  
4 contained within mapped landslides. *Third column (c, f, and i)* is the probability of landslide impact,  
5  $P(LS_r|SI_r)$ , calculated from the ratio of the number of landslide cells to the number of all cells with each  
6 SI bins with fitted curves. *Rows* represent analysis domains: *a, b, and c)* all landslide types; *d, e, and f)*  
7 debris avalanches; and *g, h, and i)* debris avalanche source areas.

8 The probability of landslide impact,  $P(LS_r|SI_r)$ , calculated from Eq. (4) are shown in the third  
9 column of Figure 6 (Fig. 6c, f, and i). In calculating this probability in the highest SI bins (e.g.,  
10  $SI \geq 8$ ), landslide sample sizes of about 500 or fewer were aggregated into the previous bin. In all  
11 three cases,  $P(LS_r|SI_r)$  increases with SI, supporting the statistical power of this empirical  
12 approach. The SI to  $P(LS_r|SI_r)$  relation is explained by a linear function when debris avalanche  
13 data are used (Fig. 6f). The other two cases, all landslide data and debris avalanche source areas,  
14 are better represented by polynomial fits (Fig. 6c and i). The range of probabilities grows with  
15 the sample size of the landslide dataset used, leading to maximum probabilities of 0.2, 0.16, and  
16 0.017 for all landslide, debris avalanches, and debris avalanche source areas, respectively. These  
17 functions were used to develop continuous empirical probability maps based on SI values  
18 assigned to each grid cell of the study domain, limited to the maximum empirical probability of  
19 each landslide type.

### 20 21 3.3 Landslide Hazard Maps

22 The probability of landslide impact estimated from SI,  $P(LS_r|SI_r)$ , declines as the amount of  
23 observational information decreases from all landslides (Fig. 7a), to debris avalanches (Fig. 7b),  
24 and debris avalanche source areas (Fig. 7c). This pattern reflects the smaller area of observed  
25 landslide data used in each case compared to the study domain. Additionally, the probability of

1 any landslide activity would be expected to be higher than the probability of initiating a debris  
2 avalanche alone. When considering all landslides, the highest probabilities are located near the  
3 base of valley walls and in topographic depressions or hollows (Fig. 7a). The hazard map  
4 developed from the empirical model using only debris avalanches (Fig 7b) also shows higher  
5 probabilities in the valley bottoms, but lower probabilities than the all landslides map at higher  
6 elevations in alpine areas where the footprint of debris avalanches is smaller compared to the  
7 deposition area, reducing the overall probabilities in the FR approach. Spatial patterns of  
8 landslide probabilities obtained from the source areas of debris avalanches (Fig. 7c) departs from  
9 the other two empirical models with the highest probabilities in middle and upper portions of  
10 valley walls, similar to the process model (Fig. 8b). Thus, the empirically-based modeling using  
11 only source areas appears to capture some of the physical processes initiating debris avalanches.  
12 Closeup areas mapped for each mapping case more clearly illustrate the landslide hazard in  
13 relation to topographic position.

14  
15 We developed a map of annual probability of shallow landslide initiation by combining the  
16 empirical SI-based probability (Fig 7c) and the process-based annual probability of landslide  
17 initiation from Strauch et al. (2018),  $P(FS_c \leq 1)$ , using the methodology developed in this paper  
18 (Eq. 8 and 9). The weight term,  $P(FS_c \leq 1)$ , and the P(LS) are shown in Fig. 8. Close ups of  
19 three locations are shown below the full NOCA maps.

20  
21 Approximately 30% of the analyzed cells had weights  $> 1$ . Weights are greater in high elevations  
22 and steep slopes, commensurate with debris avalanche source areas. Overall 88% of the NOCA  
23 area has less than annual landsliding probability of 0.1 in  $P(FS_c \leq 1)$  and P(LS) map. P(LS)  
24 map (Fig. 8c and f) shows enhanced landslide probability in areas already modeled as high  
25 probability of landslide impacts based on the processed-based shallow landslide model (Fig. 8b  
26 and e). An anomaly map created by subtracting P(LS) from  $P(FS_c \leq 1)$  provides easier display  
27 of the effect of the empirical adjustment. In the anomaly map, much of the original  $P(FS_c \leq 1)$   
28 is adjusted by less than  $\pm 0.1$  (Fig. 9). East-facing aspect, concave curvature, and elevations in  
29 the  $\sim 1,000$  to 1,600 m range show an increase in probability  $> 0.1$  (Fig. 9). Increasing  
30 probabilities on east-facing slopes compared to other aspects aligns with the FR findings (Fig. 4).

31

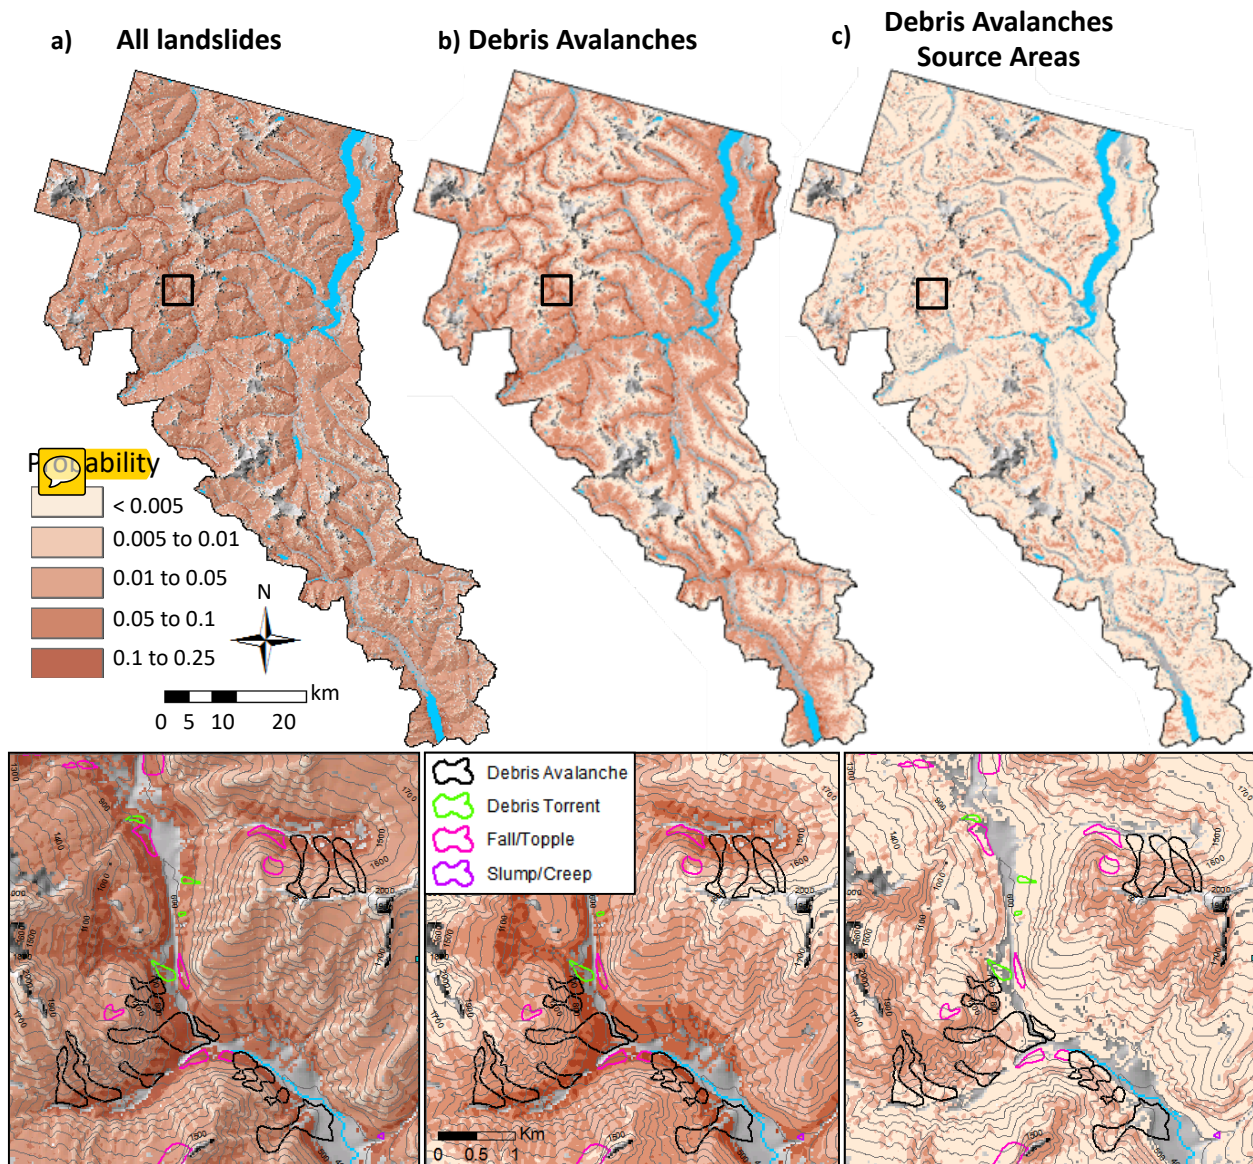

**Figure 7.** Maps of probability of landslide impact derived from empirical model based on: **a)** all landslide types, **b)** debris avalanches, and **c)** and source areas of debris avalanches overlain on hillshade raster. Boxes indicate closeup areas shown below with overlain landslide types and 100 m contours. Gray areas excluded from analysis show river valleys and glaciated crests.

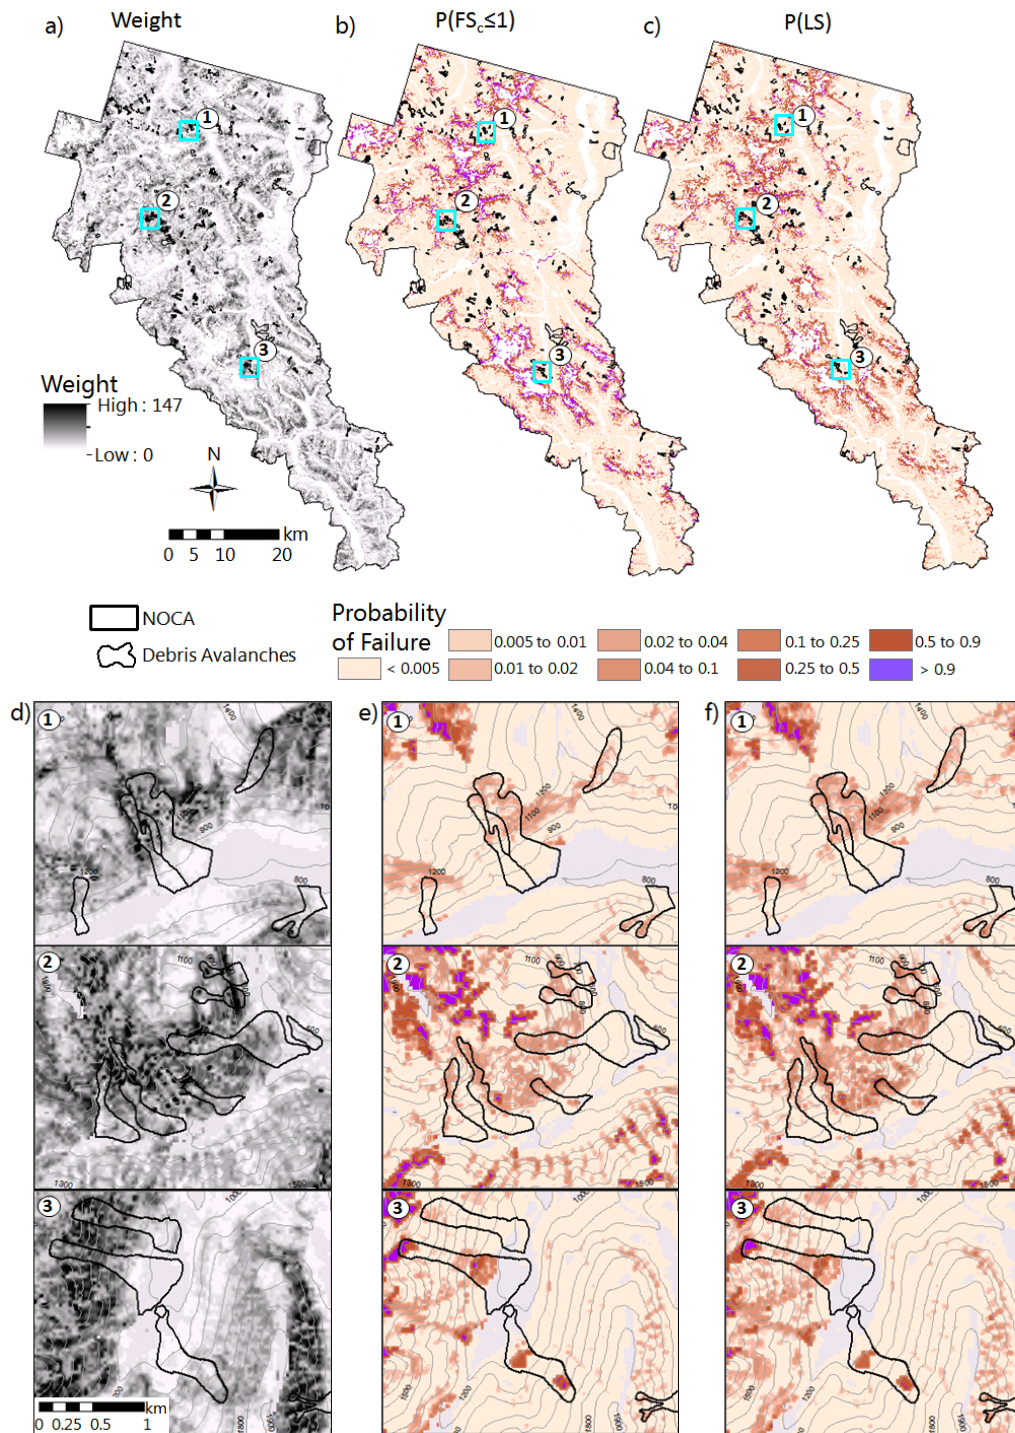

**Figure 8.** Maps of: **a)** weight term derived from joint empirical and processed-based modeled probabilities, **b)**  $P(FS_c \leq 1)$  from Strauch et al. (2018), and **c)**  $P(LS)$  created from multiplying a) by b) at each grid cell for the North Cascades National Park Complex (NOCA). Blue boxes indicate three closeup locations shown below in **d)**, **e)**, and **f)**. Black lines show mapped debris flow boundaries. Gray areas are excluded from analysis and contours are at 100 m.

Other cells declined in probability, particularly on gentler slopes, north to west-facing aspects, and at low (< 1000 m) and high (>1,600 m) elevations (Fig. 9). Areas with reduced probability high on the mountain, above the elevation limit of vegetation (~2,200 m, Fig. 5) and just below actively receding glaciers or permanent snowfields, likely represent limited soil development and active surface erosion where slopes are steep (Roering et al., 2003) (Fig. 9). Within the elevation range of the park, debris avalanche initiation is not frequently observed at the highest elevations where soil is thin or the landscape is covered seasonally by snow and ice.

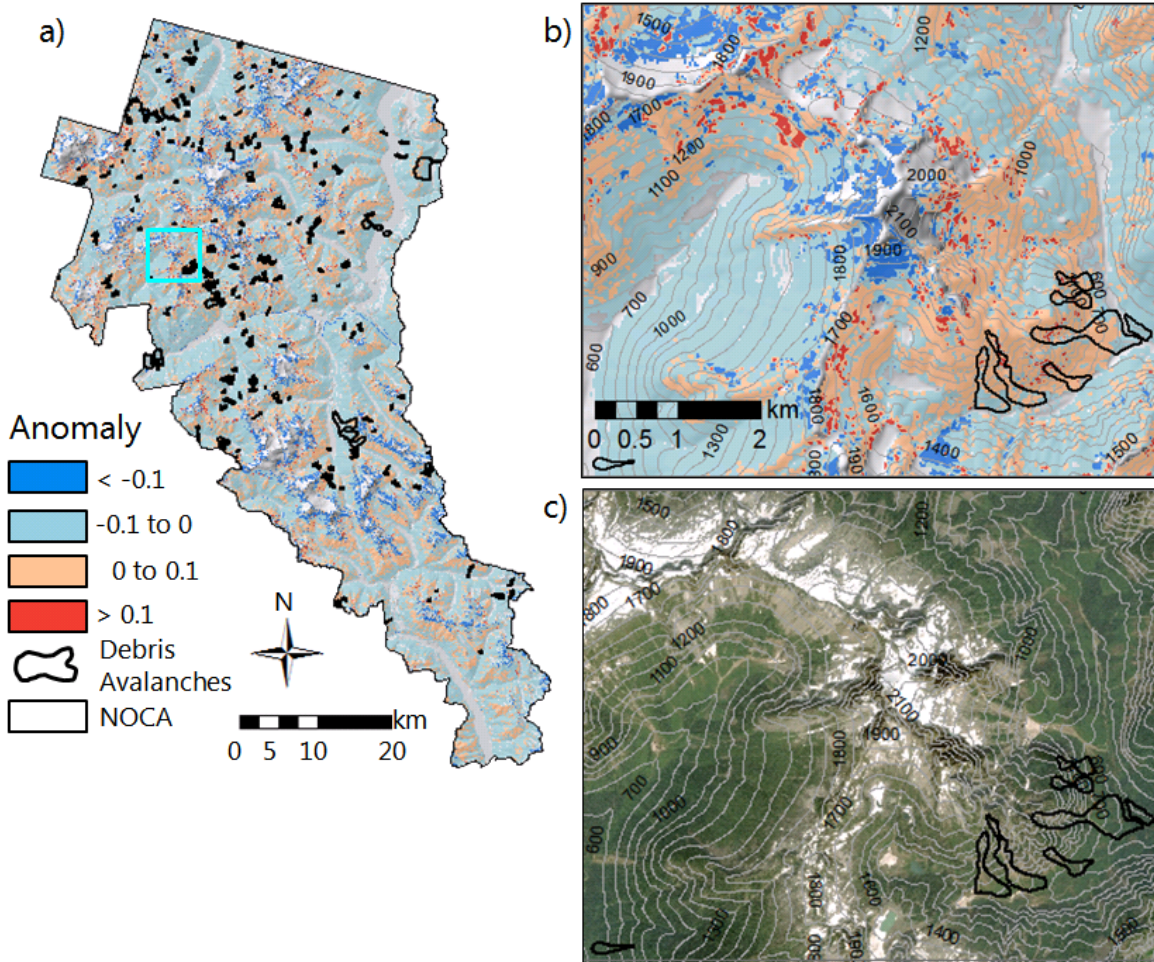

**Figure 9.** Anomaly maps displaying the difference between  $P(LS)$  and  $P(FS_c \leq 1)$  where blues represent > 0.1 reduction in probability and reds represent > 0.1 increase in probability due to the empirical adjustment. Maps of: **a)** the entire North Cascades National Park Complex, **b)** closeup location indicated by blue box in a) overlain on hillshade raster, and **c)** aerial image of the same location as b). Aerial image is from World Imagery, Esri Inc. (images created using ArcGIS® software by Esri. ArcGIS® and ArcMap™ are the intellectual property of Esri and are used herein under license. Copyright Esri©. All rights reserved. For more information about Esri® software, please visit [www.esri.com](http://www.esri.com)). Gray areas are excluded from analysis and contours are at 100 m.

To investigate the spatial distribution of  $P(FS_c \leq 1)$  (Strauch et al., 2018) and empirically-adjusted model probabilities,  $P(LS)$ , we plot the cumulative distributions of probabilities (Fig. 10a). In approximately 25% of the NOCA domain,  $P(LS)$  gives lower landslide probability than

$P(FS_c \leq 1)$ , indicated by the upward shift in the cumulative distribution (blue line) (Fig. 10a). This suggests an overall reduction in landslide probability at the broad landscape scale when empirical data is used in weighting factors, except where  $P(FS_c \leq 1)$  is already near 1.0. The modeled landscapes have  $P(\text{Failure}) \geq 0.9$  in ~6% and ~3% for  $P(FS_c \leq 1)$  and P(LS) models, respectively (Fig. 10a). These cells represent highly unstable slopes and the empirical adjustment reduced this area by half from the processed-based model. Unconditionally unstable landslide,  $P(\text{Failure})=1$ , corresponds to 0% and 2% of  $P(FS_c \leq 1)$  and P(LS) models, respectively. Unconditionally stable slopes,  $P(\text{Failure})=0$ , corresponds to 49% of the study domain for both  $P(FS_c \leq 1)$  and P(LS) models. The distributions generally show a high portion (~87 to 88%) of the modeled landscape has relatively low probability of failure,  $P(FS_c \leq 1)$ . Thus, the empirical information provides most of the hazard adjustments to the areas in between unconditionally stable and unconditional unstable conditions. Only between 7% and 9% of the landscape has a broad range of potential failure ( $0.1 \geq P(F) \geq 0.9$ ) as indicated by the shaded blue (Fig. 10a), where empirical evidence enhanced the local landscape susceptibility to initiation of shallow landslides.

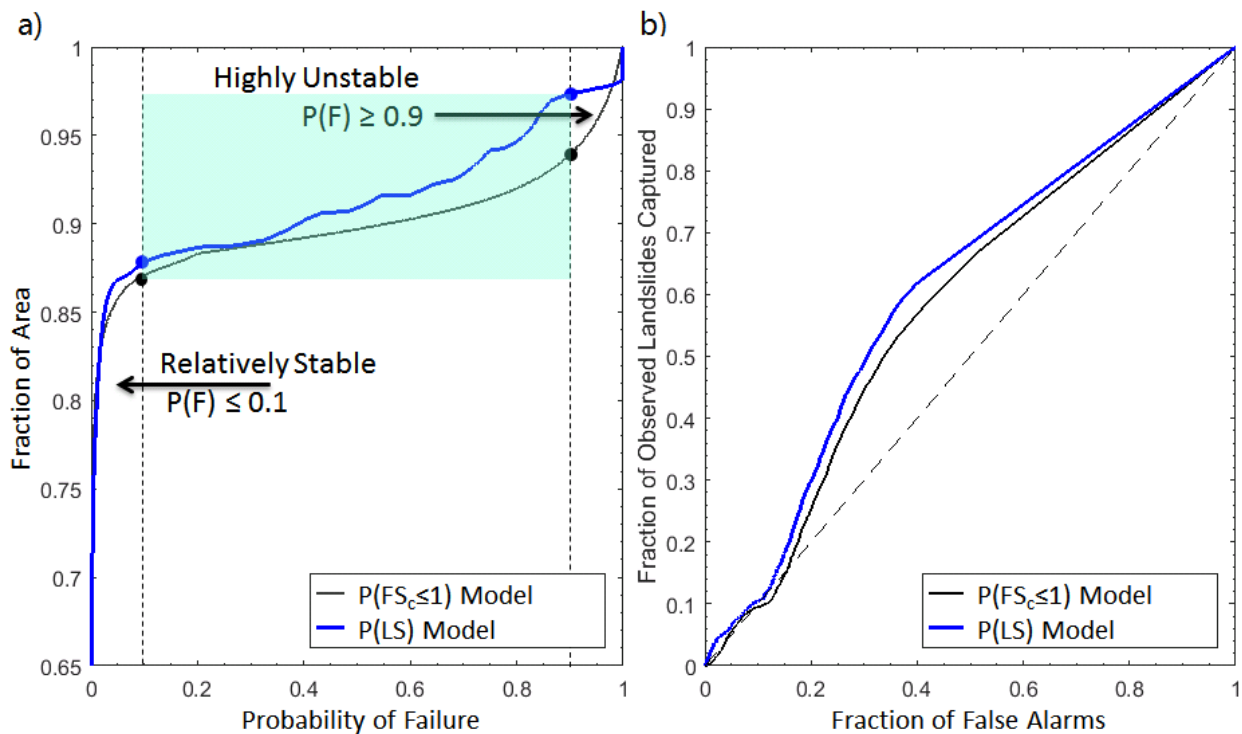

**Figure 10.** **a)** Cumulative distribution of the probability of failure for the  $P(FS_c \leq 1)$  [black] and P(LS) [blue] using only debris avalanche source areas, **b)** ROC curves for the same two datasets. The blue shaded area on a) represents the fraction of the landscape with  $0.1 \geq P(F) \geq 0.9$ . Black diagonal dashed line on a 1 : 1 line in b) represents the case of a trivial or random classification model. AUC values are 0.58 for the modeled probability and 0.60 for the integrated probability.

We anticipated that the additional consideration of the empirical model represented by the weighting term improves the performance of the purely processed-based model. Thus, to assess the potential performance of the models, we statistically evaluated the models using the receiver operating characteristics (ROC) curves (Fawcett, 2006). This approach examines cells within

mapped landslides and cells outside landslides for a study area and compares this to randomly distributed landslides over the same landscape. Confusion matrices are generated from observed and modeled landslides based on varying the probability of a landslide threshold used to generate ROC curves (Mancini, et al., 2010; El-Ramly et al., 2002; Anagnostopoulos et al., 2015) (Fig. 10b). A better-performing model curves towards the upper left corner, and a curve along the 1:1 line represents a trivial model that randomly assigns landslide and non-landslide cells. The area under the curve (AUC) statistic provides a numerical indicator of model performance representing the probability of correctly assigning two randomly selected cells to landslide and non-landslide datasets (Hanley and McNeil, 1982).

Both the processed-based model,  $P(FS_c \leq 1)$ , and the P(LS) perform better than a trivial model by plotting the ROC curve above the 1:1 line (Fig. 10b). The AUC statistic was 0.58 and 0.60 for  $P(FS_c \leq 1)$  and P(LS), respectively. The ROC and AUC indicate an improvement in the fraction of observed landslides captured by P(LS) over  $P(FS_c \leq 1)$ . The AUC for P(LS) indicates that there is a 60% chance that the proposed empirical adjustment to the process-based model would classify a landslide cell and a non-landslide cell correctly from two randomly sampled grid cells. The ROC analysis found that the optimum probability threshold for maximizing the observed landslides captured and minimizing false alarms was a probability threshold of 0.0006 (i.e., apex of the blue curve); thresholds less than this increased the false alarms and thresholds greater than this reduced the accuracy of capturing observed landslides (Fig. 10b). The additional information from empirical modeling modestly improved the processed-based model and indicates empirical evidence on landslides can capture mechanisms lacking in the infinite slope stability model. These include clustering of debris avalanches due to variability in the bedrock geology (e.g. hydrothermal alteration, steeply dipping bedding planes, and glacial oversteepening).

## 4 Conclusions

Empirically-based probability hazard maps were developed from a statistically-based susceptibility index, which integrated the influence of site attributes on observed landslides based on a frequency ratio approach. Resulting susceptibility depends on the observations of landslides considered: all types of landslides, debris avalanches only, or source areas of debris avalanches. The empirically-based probability model based on source areas was used to adjust a previously developed processed-based probabilistic model through a calculated weighting term developed from a joint spatial probability. The frequency analysis, hazard map development, and integrated probability model identified several key findings when applied to a national park:

- Frequency analysis shows a clear and growing control of local slopes greater than  $35^\circ$  on landslide initiation, while higher landslide hazard at gentler slopes ( $<30^\circ$ ) reflects depositional processes.
- Debris avalanche source areas are associated with mid to high elevation (1,400 to 1,800 m), while all landslides types and whole debris avalanches have growing impact in lower elevations ( $< 1,200$  m) with the highest impact falling in elevations  $<400$  m.
- Slope is a key attribute for the initiation of landslides, while lithology is mainly tied to transport and depositional processes.



- The transition from subalpine to alpine herbaceous vegetation with lower root cohesion correlates with higher frequency of debris avalanche initiation.
- East (west) aspect is a positive (negative) landslide-influencing factor, likely due to differences in moisture regime, and forest cover and associated root cohesion.
- Empirical statistical modeling used to adjust a process-based model of landslide initiation improved predictability of observed landslides by accounting for additional factors that influence the landscape susceptibility to failure.
- Empirical adjustments generally lowered the probability of failure of the process-based model, especially for  $0.1 \geq P(\text{failure}) \leq 0.9$  that covered between 7 to 9% of the park.

Although the approach is applicable elsewhere, our results from the empirical analyses are specific to the region they were developed and may differ in another location with different geology and landslide inventories. Additionally, the probabilities are likely to change as local conditions change from disturbance such as fire or as climate continues to change. We provide multiple landslide hazard maps for the national park that land managers can use for planning and decision making, as well as educating the public about hazards from landslides so they can minimize risks from these geohazards.

*Author contributions.* RS and EI designed the research, developed the models, performed the simulations, and created figures. JR provided data and model demonstration insights. RS prepared the manuscript with contributions from all co-authors.

*Competing interest.* The authors declare that they have no conflict of interest.

*Acknowledgements.* This research was supported by the US National Science Foundation (CBET-1336725, ICER: 1663859, PREEVENTS) and USGS Northwest Climate Adaptation Science Center. We thank Stephen Dorsch of North Cascades National Park Complex for providing electronic copies of landslide data and reports. Dan Miller and Christina Bandaragoda provided helpful suggestions on preliminary results.

## References

- Agee, J. K., and Kertis, J.: Forest types of the north Cascades National Park Service complex. *Can. J. Botany*, 65(7), 1520-1530, 1987.
- Anagnostopoulos, G. G., Fatichi, S., and Burlando, P.: An advanced process-based distributed model for the investigation of rainfall-induced landslides: The effect of process representation and boundary conditions. *Water Resour. Res.*, 51(9), 7501-7523, 2015.
- Ayalew, L., Yamagishi, H., and Ugawa, N.: Landslide susceptibility mapping using GIS-based weighted linear combination, the case in Tsugawa area of Agano River, Niigata Prefecture, Japan. *Landslides*, 1(1): 73-81, 2004.
- Baum, R.L., Galloway, D.L., and Harp, E.L.: Landslide and land subsidence hazards to pipelines: U.S. Geological Survey Open-File Report 2008-1164, 192 pp., 2008.
- Beatty, C.B.: Landslides and Slope Exposure. *J. Geol.*, 64:1, 1956.
- Bellugi, D., Milledge, D.G., Dietrich, W.E., Perron, J.T., and McKean, J.: Predicting shallow landslide size and location across a natural landscape: Application of a spectral clustering search algorithm. *J. Geophys. Res.-Earth*, 120(12): 2552-2585, 2015.

- Beven, K. J., and Kirkby, M. J.: A physically based, variable contributing area model of basin hydrology. *Hydrolog. Sci. J.*, 24(1): 43-69, 1979.
- Bordoni, M., Meisina, C., Valentino, R., Bittelli, M., and Chersich, S.: Site-specific to local-scale shallow landslides triggering zones assessment using TRIGRS, *Nat. Hazard. Earth Sys.*, 15(5): 1025-1050, 2015.
- Borga, M., Fontana, G.D., and Cazorzi, F.: Analysis of topographic and climatic control on rainfall-triggered shallow landsliding using a quasi-dynamic wetness index. *J. Hydrol.*, 268(1): 56-71, 2002.
- Carrara, A., Cardinali, M., Guzzetti, F., and Reichenback, P.: GIS technology in mapping landslide hazards, in: *Geographical Information System in Assessing Natural Hazard*, edited by: Carrara, A., and Guzzetti, F., Springer, Dordrecht, 135-175 pp., 1995.
- Carson, M. A., and Kirkby, M. J.: *Hillslope Form and Process*, Cambridge Univ. Press, Cambridge, U.K., 475 pp., 1972.
- Cevasco, A., Pepe, G., and Brandolini, P.: The influences of geological and land use settings on shallow landslides triggered by an intense rainfall event in a coastal terraced environment. *B. Eng. Geol. Environ.*, 73(3): 859-875, 2014.
- Chalkias, C., Ferentinou, M., and Polykretis, C.: GIS-based landslide susceptibility mapping on the Peloponnese Peninsula, Greece. *Geosciences*, 4(3), 176-190, 2014.
- Chung, C. F., Fabbri, A. G., and Van Western, C. J.: Multivariate regression analysis for landslide hazard zonation, in: *Geographical Information System in Assessing Natural Hazard*, edited by: Carrara, A. and Guzzetti, F., Springer, Dordrecht, 107-133, 1995.
- Coe, J. A.: Landslide hazards and climate change: A perspective from the United States, in: *Slope safety preparedness for impact of climate change*, Chapter: 14., edited by: Ho, K., Lacasse, S., and Picarelli, L., CRC Press, Boca Raton, FL., 479-523 pp., 2016.
- Collins, B. D., and Montgomery, D. R.: The legacy of Pleistocene glaciation and the organization of lowland alluvial process domains in the Puget Sound region. *Geomorphology*, 126(1): 174-185, 2011.
- Corominas, J., Van Westen, C., Frattini, P., Cascini, L., Malet, J. P., Fotopoulou, S., Catani, F., Van Den Eeckhaut, M., Mavrouli, O., Agliardi, F., and Pitilakis, K.: Recommendations for the quantitative analysis of landslide risk. *B. Eng. Geol. Environ.*, 73(2): 209-263, 2014.
- Croke, J. C., and Hairsine, P. B.: Sediment delivery in managed forests: a review. *Environ. Rev.*, 14(1), 59-87, 2006.
- Crozier, M. J.: Deciphering the effect of climate change on landslide activity: A review. *Geomorphology*, 124(3): 260-267, 2010.
- Dai, F.C., Lee, C.F.: Landslide characteristics and slope instability modeling using GIS, Lantau Island, Hong Kong. *Geomorphology* 42:213-228, 2002.
- Densmore, A.L., Anderson, R.S., McAdoo, B.G., and Ellis, M.A.: Hillslope evolution by bedrock landslides, *Science*, 275: 369-372, 1997.
- El-Ramly, H., Morgenstern, N. R., and Cruden, D. M.: Probabilistic slope stability analysis for practice, *Can. Geotech. J.*, 39, 665-683, 2002.
- Evans, R. D., and Fonda, R. W.: The influence of snow on subalpine meadow community pattern, North Cascades, Washington. *Can. J. Botany*, 68(1): 212-220, 1990.
- Fawcett, T.: An introduction to ROC analysis, *Pattern Recogn. Lett.*, 27(8):861-874, 2006.
- Fischer, L., Käab, A., Huggel, C., and Noetzli, J.: Geology, glacier retreat and permafrost degradation as controlling factors of slope instabilities in a high-mountain rock wall: the Monte Rosa east face. *Nat. Hazard. Earth Sys.*, 6(5): 761-772, 2006.
- Gabet, E. J.: Sediment transport by dry ravel. *J. Geophys. Res.-Sol. Ea.*, 108(B1), 2003.
- Geroy, I. J., Gribb, M. M., Marshall, H. P., Chandler, D. G., Benner, S. G. and McNamara, J. P.: Aspect influences on soil water retention and storage. *Hydrol. Process.*, 25, 3836-3842, doi:10.1002/hyp.8281, 2011.

- Ghirotti, M.: The 1963 Vaiont landslide, Italy, in: *Landslides: Types, mechanisms and modeling*, edited by: Claque, J. J. and Stead, D. Cambridge University Press, NY., 359 pp, 2012.
- Gokceoglu, C., Sonmez, H., Nefeslioglu, H. A., Duman, T. Y., and Can, T.: The 17 March 2005 Kuzulu landslide (Sivas, Turkey) and landslide-susceptibility map of its near vicinity. *Eng. Geol.*, 81(1): 65-83, 2005.
- Gupta, R. P., and Joshi, B. C.: Landslide hazard zoning using the GIS approach—a case study from the Ramganga catchment, Himalayas. *Eng. Geol.*, 28(1): 119-131, 1990.
- Haerberli, W., Schaub, Y., Huggel, C.: Increasing risks related to landslides from degrading permafrost into new lakes in de-glaciating mountain ranges. *Geomorphology*: <https://doi.org/10.1016/j.geomorph.2016.02.009>, 2016.
- Hales, T. C., Ford, C. R., Hwang, T., Vose, J. M., and Band, L. E.: Topographic and ecologic controls on root reinforcement, *J. Geophys. Res.*, 114, F03013, doi:10.1029/2008JF001168, 2009.
- Hamlet, A. F., Elsner, M. M., Mauger, G., Lee, S., and Tohver, I.: An Overview of the Columbia Basin Climate Change Scenarios Project: Approach, Methods, and Summary of Key Results, *Atmos. Ocean.*, 51, 392–415, 2013.
- Hanley, J. A. and McNeil, B. J.: The meaning and use of the area under a receiver operating characteristic (ROC) curve, *Radiology*, 143, 29–36, 1982.
- Haugerud, R.A., and Tabor, R.W.: *Geologic map of the North Cascade Range, Washington, US* Department of the Interior, U.S. Geological Survey, 29 pp., 2009.
- Hobley, D. E. J., Adams, J. M., Nudurupati, S. S., Hutton, E. W. H., Gasparini, N. M., Istanbuluoglu, E., and Tucker, G. E.: Creative computing with Landlab: an open-source toolkit for building, coupling, and exploring two-dimensional numerical models of Earth-surface dynamics, *Earth Surf. Dynam.*, 5, 21–46, <https://doi.org/10.5194/esurf-5-21-2017>, 2017.
- Hong, H., Chen, W., Xu, C., Youssef, A. M., Pradhan, B., and Tien Bui, D.: Rainfall-induced landslide susceptibility assessment at the Chongren area (China) using frequency ratio, certainty factor, and index of entropy. *Geocarto Int.*, 32(2): 139-154, 2017.
- Hungr, O., Leroueil, S., and Picarelli, L.: The Varnes classification of landslide types, an update. *Landslides*, 11(2): 167-194, 2014.
- Jin, S, Yang L, Danielson P, Homer C, Fry J, and Xian, G.: A comprehensive change detection method for updating the National Land Cover Database to circa 2011, *Remote Sens. Environ.*, 132: 159 175, 2013.
- Kelsey, H.M.: Formation of inner gorges, *Catena*, 1 5: 433-458, 1988.
- Kirschbaum, D.B., Adler, R., Hong, Y., Kumar, S., Peters-Lidard, C., and Lerner-Lam, A.: Advances in landslide nowcasting: evaluation of global and regional modeling approach. *Environ. Earth. Sci.*, 66: 1683-1696, 2012.
- LaHusen, S. R., Duvall, A. R., Booth, A. M., and Montgomery, D. R.: Surface roughness dating of long-runout landslides near Oso, Washington (USA), reveals persistent postglacial hillslope instability. *Geology*, 44(2): 111-114, 2016.
- Lee S., Pradhan, B.: Landslide hazard mapping at Selangor, Malaysia using frequency ratio and logistic regression models. *Landslides*, 4:33–41, 2007.
- Lee, S., Ryu J. H., Kim, I. S.: Landslide susceptibility analysis and its verification using likelihood ratio, logistic regression, and artificial neural network models: Case study of Youngin, Korea. *Landslides*, 4:327–338, 2007.
- Lepore, C., Kamal, S. A., Shanahan, P., and Bras, R. L.: Rainfall-induced landslide susceptibility zonation of Puerto Rico. *Environ. Earth Sci.*, 66(6): 1667-1681, 2012.
- Mancini, F., Ceppi, C., and Ritrovato, G.: GIS and statistical analysis for landslide susceptibility mapping in the Daunia area, Italy, *Nat. Hazard. Earth Sys.*, 10(9): 1851, 2010.
- May, C.L., Pryor, B., Lisle, T.E., Lang, M.: Coupling hydrodynamic modeling and empirical measures of bed mobility to predict the risk of scour and fill of salmon redds in a large regulated river. *Water Resour. Res.* 45: W05402, 2009.

- Megahan, W.F., Day, N.F., and Bliss, T. M.: Landslide occurrence in the western and central Northern Rocky Mountain physiographic province in Idaho, in *Forest Soils and Land Use: Proceedings of the Fifth North American Forest Soils Conference*, edited by: Youngberg, C.T., CSU, Ft. Collins, CO, 116-139 pp., 1978.
- Miller, D. J., and Burnett, K. M.: Effects of forest cover, topography, and sampling extent on the measured density of shallow, translational landslides: *Water Resour. Res.*, v. 43, no. W03433, 2007.
- Montgomery, D. R.: Road surface drainage, channel initiation, and slope instability. *Water Resour. Res.*, 30(6): 1925-1932, 1994.
- Montgomery, D.R.: Slope distributions, threshold hillslopes, and steady-state topography. *Am. J. Sci.*, 301(4-5): 432-454, 2001.
- Mustoe, G. E., and Leopold, E. B.: Paleobotanical evidence for the post-Miocene uplift of the Cascade Range. *Can. J. Earth Sci.*, 51(8): 809-824, 2014.
- O'loughlin, E. M.: Prediction of surface saturation zones in natural catchments by topographic analysis. *Water Resour. Res.*, 22(5): 794-804, 1986.
- Pachauri, A. K., and Pant, M.: Landslide hazard mapping based on geological attributes. *Eng. Geol.*, 32(1-2), 81-100, 1992.
- Pelto M. S., and Riedel, J.: Spatial and temporal variations in annual balance of North Cascade glaciers, Washington 1984–2000. *Hydrol. Process.*, 15: 3461–3472, 2001.
- Pollock, M. M.: Biodiversity, in: *River Ecology and Management: Lessons From the Pacific Coastal Ecoregion*, edited by: Naiman, R. J., and Bilby, R. E., Springer-Verlag, New York. 430–452 pp., 1998.
- Poulos, M. J., Pierce, J. L., Flores, A. N., and Benner, S. G.: Hillslope asymmetry maps reveal widespread, multi-scale organization, *Geophys. Res. Lett.*, 39, L06406, doi:10.1029/2012GL051283, 2012.
- Riedel, J., Dorsch, S., and Wenger, J.: Geomorphology of the Stehekin River watershed: Landform mapping at North Cascades National Park Service Complex, Washington. Natural Resource Technical Report NPS/NCCN/NRTR—2012/566. National Park Service, Fort Collins, Colorado, 90 pp., 2012.
- Riedel, J. L., Haugerud, R. A., and Clague, J. J.: Geomorphology of a Cordilleran Ice Sheet drainage network through breached divides in the North Cascades Mountains of Washington and British Columbia. *Geomorphology*, 91(1-2), 1-18, 2007.
- Riedel, J., and Prohala, J.: Mapping ecosystems at the landform scale in Washington state, *Park Science*, 23-2: 37-42, 2005.
- Roering, J. J., Schmidt, K. M., Stock, J. D., Dietrich, W. E., and Montgomery, D. R.: Shallow landsliding, root reinforcement, and the spatial distribution of trees in the Oregon Coast Range, *Can. Geotech. J.*, 40, 237–253, 2003.
- Roe, G.H.: Orographic Precipitation. *Annu. Rev. Earth Planet. Sci.*, 33:645–71, 2005.
- Sidele, R.C., and Ochiai, H.: Landslides: processes, prediction, and land use, *Water Resources Monograph* 18, American Geophysical Union, Washington DC, 2006.
- Strauch, R., Istanbuluoglu, E., Nudurupati, S. S., Bandaragoda, C., Gasparini, N. M., and Tucker, G. E.: A hydro-climatological approach to predicting regional landslide probability using Landlab, *Earth Surf. Dynam.*, 6(1), 49-75. <https://doi.org/10.5194/esurf-6-49-2018>, 2018.
- Swanson, F. J., and Dyrness, C. T. : Impact of clear-cutting and road construction on soil erosion by landslides in the western Cascade Range, Oregon, *Geology*, 3: 393-396, 1975.
- Taylor, F.A., and Brabb, E. E.: Map showing landslides in California that have caused fatalities or at least \$1,000,000 in damages from 1906 to 1984: U.S. Geological Survey Miscellaneous Field Studies Map, MF- 1867, scale: 1:1,000,000, 1986.
- United States Department of the Interior, National Park Service (DOI-NPS): Foundation Document, North Cascades National Park Complex, Washington. Available from:

- [https://www.nps.gov/noca/learn/management/upload/North-Cascades-NP-Complex-Foundation-Document\\_small.pdf](https://www.nps.gov/noca/learn/management/upload/North-Cascades-NP-Complex-Foundation-Document_small.pdf), last accessed: 23 January 2017, 2012.
- United States Geologic Survey (USGS): National Elevation Data last modified March 6, 2014, National Map Viewer, last accessed: 24 November 2014, 2014a.
- USGS: National Land Cover Data (NLCD) version Marched 31, 2014, National Map Viewer, last accessed: 25 November 2014, 2014b.
- Van Westen, C.J., Van Asch, T.W., and Soeters, R.: Landslide hazard and risk zonation—why is it still so difficult? *B. Eng. Geol. Environ.*, 65(2): 167-184, 2006.
- Wartman, J., Montgomery, D.R., Anderson, S.A., Keaton, J.R., Benoît, J., dela Chapelle, J., and Gilbert, R. (2016). The 22 March 2014 Oso landslide, Washington, USA. *Geomorphology*, 253: 275-288.
- Washington State Department of Natural Resources (WADNR): *Geologic\_unit\_poly\_100k*. Vector digital data, published June 2010. Division of Geology and Earth Resources, Olympia, WA, last accessed: March 27, 2014, 2014.
- Wooten, R. M., Witt, A. C., Miniati, C. F., Hales, T. C., and Aldred, J. L.: Frequency and magnitude of selected historical landslide events in the southern Appalachian Highlands of North Carolina and Virginia: relationships to rainfall, geological and ecohydrological controls, and effects, in: *Natural Disturbances and Historic Range of Variation*, edited by: Greenberg, C. H., and Collins, B. S., Springer International Publishing, Switzerland, 203-262 pp., DOI 10.1007/978-3-319-21527-3, 2016.
- Wu, Z., Wu, Y., Yang, Y., Chen, F., Zhang, N., Ke, Y., and Li, W.: A comparative study on the landslide susceptibility mapping using logistic regression and statistical index models. *Arab. J. Geosci.*, 10(8), 187, 2017.
